# Supplementary material
Source: publisher site journal article supplement (https://www.spandidos-publications.com/6049/downloadSupplementary)
Supplement: Supplementary file 1 [file downloadSupplementary]

## Sheet: Gene_mutationsMon Jul 10 22_36_
Table SIII. Summary of mutations in the VHL and KDR genes in ccRCC retrieved from the COSMIC database.
Position	CDS Mutation	AA Mutation	Legacy Mutation ID	Count	Type
1	c.1_*del	p.0	COSM5878725	3	Whole gene deletion
1	c.3G>A	p.M1?	COSM14367	2	Frameshift
2	c.6C>T	p.P2=	COSM3727790	1	Substitution - coding silent
5	c.14_16del	p.A5del	COSM18013	1	Deletion - In frame
7	c.19A>G	p.N7D	COSM18361	1	Substitution - Missense
8	c.24G>A	p.W8*	COSM18368	1	Substitution - Nonsense
10	c.29A>G	p.E10G	COSM14338	2	Substitution - Missense
11	c.31G>A	p.A11T	COSM36213	1	Substitution - Missense
12	c.34G>A	p.E12K	COSM14339	2	Substitution - Missense
15	c.41_42insA	p.A15Rfs*12	COSM17851	1	Insertion - Frameshift
19	c.57C>A	p.G19=	COSM14364	1	Substitution - coding silent
19	c.57C>T	p.G19=	COSM1417281	2	Substitution - coding silent
25	c.73C>T	p.P25S	COSM18359	1	Substitution - Missense
25	c.74C>T	p.P25L	COSM36211	4	Substitution - Missense
25	c.?	p.P25L	COSM5945839	1	Substitution - Missense
26	c.76G>A	p.E26K	COSM14369	1	Substitution - Missense
26	c.77A>G	p.E26G	COSM14351	1	Substitution - Missense
28	c.83A>G	p.D28G	COSM1169470	2	Substitution - Missense
28	c.83A>T	p.D28V	COSM14365	1	Substitution - Missense
31	c.90_91del	p.E31Gfs*100	COSM14335	2	Deletion - Frameshift
31	c.92A>G	p.E31G	COSM14340	1	Substitution - Missense
33	c.96dup	p.S33Vfs*99	COSM18326	1	Insertion - Frameshift
33	c.97T>G	p.S33A	COSM18325	1	Substitution - Missense
33	c.98C>A	p.S33*	COSM1684700	1	Substitution - Nonsense
34	c.102C>T	p.G34=	COSM17687	1	Substitution - coding silent
36	c.108G>A	p.E36=	COSM18360	1	Substitution - coding silent
37	c.109G>A	p.E37K	COSM17997	1	Substitution - Missense
38	c.113C>T	p.S38F	COSM17688	1	Substitution - Missense
38	c.114C>T	p.S38=	COSM18380	1	Substitution - coding silent
39	c.115G>A	p.G39S	COSM14370	4	Substitution - Missense
39	c.116G>A	p.G39D	COSM14345	2	Substitution - Missense
40	c.118C>T	p.P40S	COSM17690	2	Substitution - Missense
40	c.119C>T	p.P40L	COSM3364915	3	Substitution - Missense
41	c.122A>G	p.E41G	COSM3364916	1	Substitution - Missense
41	c.122A>T	p.E41V	COSM17692	2	Substitution - Missense
42	c.125A>T	p.E42V	COSM17694	1	Substitution - Missense
43	c.128C>T	p.S43F	COSM3364886	1	Substitution - Missense
43	c.129C>T	p.S43=	COSM18381	1	Substitution - coding silent
44	c.131G>A	p.G44D	COSM18369	1	Substitution - Missense
45	c.133C>T	p.P45S	COSM3364917	1	Substitution - Missense
45	c.134C>T	p.P45L	COSM3364887	3	Substitution - Missense
45	c.135G>A	p.P45=	COSM17998	1	Substitution - coding silent
47	c.139_141delinsAAG	p.E47K	COSM14354	1	Substitution - Missense
47	c.139_141delinsAAT	p.E47N	COSM3727786	1	Substitution - Missense
48	c.142C>G	p.L48V	COSM17695	1	Substitution - Missense
48	c.144G>A	p.L48=	COSM3727784	2	Substitution - coding silent
49	c.145G>T	p.G49C	COSM17691	1	Substitution - Missense
49	c.146G>A	p.G49D	COSM18365	1	Substitution - Missense
50	c.148G>A	p.A50T	COSM17999	2	Substitution - Missense
50	c.148G>C	p.A50P	COSM18362	1	Substitution - Missense
50	c.149C>G	p.A50G	COSM17696	1	Substitution - Missense
50	c.149C>T	p.A50V	COSM1169459	1	Substitution - Missense
51	c.151G>C	p.E51Q	COSM17698	2	Substitution - Missense
51	c.151G>T	p.E51*	COSM253333	1	Substitution - Nonsense
52	c.154_166del	p.E52Pfs*11	COSM17991	1	Deletion - Frameshift
52	c.155_196del	p.E52_S65del	COSM26783	2	Deletion - In frame
53	c.157_163del	p.E53Rfs*12	COSM53038	1	Deletion - Frameshift
53	c.159G>A	p.E53=	COSM18374	1	Substitution - coding silent
54	c.160_161insG	p.M54Sfs*78	COSM98452	1	Insertion - Frameshift
54	c.160_172del	p.M54Gfs*9	COSM4770207	1	Deletion - Frameshift
54	c.160_174del	p.M54_R58del	COSM1757299	1	Deletion - In frame
54	c.160_175del	p.M54Rfs*8	COSM17635	1	Deletion - Frameshift
54	c.160_194del	p.M54Gfs*66	COSM6503420	1	Deletion - Frameshift
54	c.161_162del	p.M54Rfs*77	COSM6506362	1	Deletion - Frameshift
54	c.162_166del	p.M54Ifs*76	COSM17673	2	Deletion - Frameshift
55	c.163G>T	p.E55*	COSM249129	3	Substitution - Nonsense
55	c.163del	p.E55Rfs*12	COSM17867	3	Deletion - Frameshift
55	c.163dup	p.E55Gfs*77	COSM7254240	5	Insertion - Frameshift
55	c.164_165del	p.E55Gfs*76	COSM3734691	1	Deletion - Frameshift
55	c.164_167del	p.E55Afs*11	COSM6937004	1	Deletion - Frameshift
55	c.164_177del	p.E55Afs*72	COSM6983894	1	Deletion - Frameshift
55	c.164_179del	p.E55Gfs*7	COSM6967984	1	Deletion - Frameshift
55	c.164del	p.E55Gfs*12	COSM1757298	1	Deletion - Frameshift
56	c.164dup	p.A56Gfs*76	COSM6506447	1	Insertion - Frameshift
56	c.165_166insA	p.A56Sfs*76	COSM30255	1	Insertion - Frameshift
56	c.166del	p.A56Pfs*11	COSM17701	6	Deletion - Frameshift
56	c.166dup	p.A56Gfs*76	COSM3734689	2	Insertion - Frameshift
56	c.167_168del	p.A56Gfs*75	COSM98453	2	Deletion - Frameshift
56	c.167_173del	p.A56Gfs*9	COSM253335	1	Deletion - Frameshift
56	c.167_179del	p.A56Gfs*7	COSM18352	1	Deletion - Frameshift
57	c.168_172del	p.G57Afs*73	COSM26784	2	Deletion - Frameshift
57	c.168_178del	p.G57Afs*71	COSM9645697	1	Deletion - Frameshift
57	c.168_184del	p.G57Afs*69	COSM253336	1	Deletion - Frameshift
57	c.170_177del	p.G57Afs*72	COSM14334	2	Deletion - Frameshift
57	c.171G>C	p.G57=	COSM18366	1	Substitution - coding silent
58	c.171_177del	p.R58Gfs*7	COSM33995	1	Deletion - Frameshift
58	c.171_180del	p.R58Pfs*6	COSM36349	2	Deletion - Frameshift
58	c.171del	p.R58Gfs*9	COSM14304	7	Deletion - Frameshift
58	c.172C>A	p.R58=	COSM17948	1	Substitution - coding silent
58	c.172C>T	p.R58W	COSM1731984	1	Substitution - Missense
58	c.172_173delinsTA	p.R58*	COSM36357	1	Substitution - Nonsense
58	c.172_176delinsG	p.R58Gfs*8	COSM6834735	1	Complex - frameshift
58	c.172del	p.R58Gfs*9	COSM6506448	1	Deletion - Frameshift
58	c.173_182del	p.R58Pfs*6	COSM14282	1	Deletion - Frameshift
59	c.171_174del	p.P59Gfs*7	COSM51390	1	Deletion - Frameshift
59	c.174del	p.P59Rfs*8	COSM25243	2	Deletion - Frameshift
59	c.174dup	p.P59Afs*73	COSM6834747	2	Insertion - Frameshift
59	c.175_177delinsTC	p.P59Sfs*8	COSM26788	2	Complex - frameshift
59	c.175_183del	p.P59_P61del	COSM17636	1	Deletion - In frame
59	c.176del	p.P59Rfs*8	COSM18367	2	Deletion - Frameshift
59	c.177G>A	p.P59=	COSM36214	1	Substitution - coding silent
60	c.171delinsCCGGCCGGC	p.R60Afs*10	COSM34032	1	Complex - frameshift
60	c.174_180del	p.R60Cfs*5	COSM423173	1	Deletion - Frameshift
60	c.178C>T	p.R60W	COSM18371	1	Substitution - Missense
60	c.178_179del	p.R60Afs*71	COSM18151	1	Deletion - Frameshift
60	c.178_184del	p.R60Cfs*5	COSM253338	1	Deletion - Frameshift
60	c.178_287del	p.R60Afs*35	COSM18391	1	Deletion - Frameshift
60	c.179_182del	p.R60Pfs*6	COSM18081	1	Deletion - Frameshift
61	c.180_184del	p.P61Afs*69	COSM18213	1	Deletion - Frameshift
61	c.180_208del	p.P61Afs*61	COSM14402	1	Deletion - Frameshift
61	c.181_219del	p.P61_Q73del	COSM7253584	1	Deletion - In frame
61	c.182_187delinsTTTT	p.P61Lfs*70	COSM30384	1	Complex - frameshift
61	c.182_207del	p.P61Rfs*62	COSM98454	1	Deletion - Frameshift
61	c.183C>G	p.P61=	COSM25363	2	Substitution - coding silent
61	c.183C>T	p.P61=	COSM17693	3	Substitution - coding silent
62	c.180del	p.V62Cfs*5	COSM18127	2	Deletion - Frameshift
62	c.183_187del	p.V62Afs*68	COSM17702	2	Deletion - Frameshift
62	c.183_195del	p.V62*	COSM18140	1	Deletion - Frameshift
62	c.183del	p.V62Cfs*5	COSM17679	13	Deletion - Frameshift
62	c.184_185insCCCTGCTGCGCTGCGGTGAG	p.V62Afs*12	COSM1169656	1	Insertion - Frameshift
62	c.184_187del	p.V62Cfs*4	COSM3734705	2	Deletion - Frameshift
62	c.184del	p.V62Cfs*5	COSM18029	1	Deletion - Frameshift
62	c.185_186del	p.V62Afs*69	COSM3358432	1	Deletion - Frameshift
62	c.185_193delinsGC	p.V62Gfs*3	COSM18210	1	Complex - frameshift
62	c.185_214delinsG	p.V62Gfs*60	COSM9517552	2	Complex - frameshift
62	c.?	p.V62Xfs*5	COSM1570322	1	Frameshift
63	c.187_188delinsTA	p.L63*	COSM674220	1	Substitution - Nonsense
63	c.187del	p.L63Cfs*4	COSM17861	1	Deletion - Frameshift
63	c.187dup	p.L63Pfs*69	COSM3734703	1	Insertion - Frameshift
64	c.186_199del	p.R64Afs*63	COSM33996	1	Deletion - Frameshift
64	c.189_193del	p.R64Gfs*66	COSM6963657	1	Deletion - Frameshift
64	c.189_202del	p.R64Afs*63	COSM253339	1	Deletion - Frameshift
64	c.189del	p.R64Afs*3	COSM6834737	1	Deletion - Frameshift
64	c.190_191insTC	p.R64Lfs*4	COSM98459	1	Insertion - Frameshift
64	c.?	p.R64S	COSM7455347	2	Substitution - Missense
65	c.192_198del	p.S65Tfs*92	COSM17672	2	Deletion - Frameshift
65	c.192del	p.S65Rfs*2	COSM17681	2	Deletion - Frameshift
65	c.193T>A	p.S65T	COSM97135	2	Substitution - Missense
65	c.193T>C	p.S65P	COSM18074	5	Substitution - Missense
65	c.193_194delinsCA	p.S65Q	COSM30407	1	Substitution - Missense
65	c.193del	p.S65Rfs*2	COSM423174	1	Deletion - Frameshift
65	c.194C>A	p.S65*	COSM18015	27	Substitution - Nonsense
65	c.194C>G	p.S65W	COSM34005	7	Substitution - Missense
65	c.194C>T	p.S65L	COSM14400	26	Substitution - Missense
65	c.194_195delinsAA	p.S65*	COSM18087	1	Substitution - Nonsense
65	c.194_197del	p.S65*	COSM7253218	1	Insertion - Frameshift
65	c.194_201del	p.S65Ffs*64	COSM9645695	1	Deletion - Frameshift
65	c.194del	p.S65Wfs*2	COSM1731985	1	Deletion - Frameshift
65	c.195G>A	p.S65=	COSM18085	1	Substitution - coding silent
65	c.195G>C	p.S65=	COSM17705	1	Substitution - coding silent
65	c.?	p.S65*	COSM97123	3	Substitution - Nonsense
65	c.?	p.S65L	COSM1570310	1	Substitution - Missense
65	c.?	p.S65T	COSM1570300	1	Substitution - Missense
66	c.195_201del	p.V66Rfs*91	COSM7253697	1	Deletion - Frameshift
66	c.196_198del	p.V66del	COSM1169458	1	Deletion - In frame
66	c.196_204del	p.V66_S68del	COSM26789	3	Deletion - In frame
66	c.196del	p.V66*	COSM253340	3	Deletion - Frameshift
66	c.196dup	p.V66Gfs*66	COSM30322	1	Insertion - Frameshift
66	c.197_199del	p.V66_N67delinsD	COSM3734688	1	Deletion - In frame
66	c.197del	p.V66Gfs*93	COSM18282	1	Deletion - Frameshift
67	c.197dup	p.N67Efs*65	COSM423289	1	Insertion - Frameshift
67	c.198_214del	p.N67Pfs*59	COSM14416	1	Deletion - Frameshift
67	c.198_221del	p.N67_V74del	COSM17706	1	Deletion - In frame
67	c.198dup	p.N67Efs*65	COSM98461	2	Insertion - Frameshift
67	c.199_211del	p.N67Pfs*88	COSM6023773	1	Deletion - Frameshift
67	c.200A>G	p.N67S	COSM14301	1	Substitution - Missense
67	c.200del	p.N67Tfs*92	COSM36350	3	Deletion - Frameshift
67	c.200dup	p.N67Kfs*65	COSM6965112	1	Insertion - Frameshift
67	c.201_203delinsG	p.N67Kfs*64	COSM85751	1	Complex - frameshift
67	c.201_206delinsA	p.N67Kfs*63	COSM18253	1	Complex - frameshift
67	c.?	p.N67Xfs*158	COSM7455343	2	Frameshift
68	c.201del	p.S68Rfs*91	COSM423176	1	Deletion - Frameshift
68	c.202T>A	p.S68T	COSM17707	2	Substitution - Missense
68	c.202T>C	p.S68P	COSM30212	4	Substitution - Missense
68	c.202_203del	p.S68Afs*63	COSM7254339	1	Deletion - Frameshift
68	c.203C>A	p.S68*	COSM14372	26	Substitution - Nonsense
68	c.203C>T	p.S68L	COSM17870	1	Substitution - Missense
68	c.203_204delinsAA	p.S68*	COSM14324	1	Substitution - Nonsense
68	c.203del	p.S68Cfs*91	COSM9994391	1	Deletion - Frameshift
68	c.204G>A	p.S68=	COSM18378	1	Substitution - coding silent
68	c.?	p.S68*	COSM1570311	2	Substitution - Nonsense
68	c.?	p.S68T	COSM1570299	1	Substitution - Missense
69	c.203dup	p.R69Afs*63	COSM17864	1	Insertion - Frameshift
69	c.204del	p.R69Afs*90	COSM17708	2	Deletion - Frameshift
69	c.204dup	p.R69Afs*63	COSM6945639	1	Insertion - Frameshift
69	c.205C>T	p.R69C	COSM18343	1	Substitution - Missense
69	c.205_207del	p.R69del	COSM17949	1	Deletion - In frame
69	c.205_208del	p.R69Sfs*89	COSM18344	1	Deletion - Frameshift
69	c.205del	p.R69Afs*90	COSM17710	1	Deletion - Frameshift
69	c.206_208del	p.R69_E70delinsQ	COSM14417	2	Deletion - In frame
70	c.207_208del	p.E70Afs*61	COSM18348	4	Deletion - Frameshift
70	c.207_208dup	p.E70Afs*90	COSM253341	1	Insertion - Frameshift
70	c.207_223del	p.E70Lfs*56	COSM7254280	1	Deletion - Frameshift
70	c.207del	p.E70Sfs*89	COSM249483	1	Deletion - Frameshift
70	c.208G>T	p.E70*	COSM17711	12	Substitution - Nonsense
70	c.208_220del	p.E70Sfs*85	COSM17871	1	Deletion - Frameshift
70	c.209_210del	p.E70Afs*61	COSM18157	1	Deletion - Frameshift
70	c.209_214del	p.E70_S72delinsA	COSM18208	2	Deletion - In frame
70	c.209_226del	p.E70_F76delinsV	COSM98462	1	Deletion - In frame
70	c.209_243del	p.E70Afs*50	COSM4770213	1	Deletion - Frameshift
70	c.209del	p.E70Gfs*89	COSM36348	2	Deletion - Frameshift
70	c.?	p.E70*	COSM5757590	2	Substitution - Nonsense
71	c.211_223del	p.P71Sfs*84	COSM17932	1	Deletion - Frameshift
71	c.212_225del	p.P71Lfs*56	COSM423177	1	Deletion - Frameshift
71	c.212_231del	p.P71Qfs*54	COSM7253320	1	Deletion - Frameshift
71	c.213C>T	p.P71=	COSM3364918	2	Substitution - coding silent
72	c.213_214insA	p.S72Ifs*60	COSM9518368	1	Insertion - Frameshift
72	c.213del	p.S72Pfs*87	COSM17926	12	Deletion - Frameshift
72	c.214T>C	p.S72P	COSM97136	4	Substitution - Missense
72	c.214_216del	p.S72del	COSM98463	1	Deletion - In frame
72	c.214del	p.S72Pfs*87	COSM7253579	1	Deletion - Frameshift
72	c.214dup	p.S72Ffs*60	COSM1731986	1	Insertion - Frameshift
72	c.215_216delinsA	p.S72Yfs*87	COSM98464	1	Complex - frameshift
72	c.215_259del	p.S72_V87delinsL	COSM17712	1	Deletion - In frame
72	c.216C>A	p.S72=	COSM479166	1	Substitution - coding silent
73	c.216_217del	p.Q73Gfs*58	COSM3734704	1	Deletion - Frameshift
73	c.216_217delinsAT	p.Q73*	COSM479167	1	Substitution - Nonsense
73	c.216_217dup	p.Q73Pfs*87	COSM3358433	1	Insertion - Frameshift
73	c.217C>A	p.Q73K	COSM1731987	1	Substitution - Missense
73	c.217C>T	p.Q73*	COSM17872	13	Substitution - Nonsense
73	c.217del	p.Q73Rfs*86	COSM17637	4	Deletion - Frameshift
73	c.218_219del	p.Q73Rfs*58	COSM3734712	1	Deletion - Frameshift
73	c.218_220del	p.Q73_V74delinsL	COSM6023880	1	Deletion - In frame
73	c.218_221del	p.Q73Pfs*85	COSM9989808	1	Deletion - Frameshift
73	c.218del	p.Q73Rfs*86	COSM36356	2	Deletion - Frameshift
73	c.219G>A	p.Q73=	COSM17714	1	Substitution - coding silent
73	c.219_220del	p.Q73Hfs*58	COSM6023912	1	Deletion - Frameshift
73	c.?	p.Q73*	COSM1570313	1	Substitution - Nonsense
74	c.218dup	p.V74Gfs*58	COSM17680	1	Insertion - Frameshift
74	c.220del	p.V74Sfs*85	COSM17841	3	Deletion - Frameshift
74	c.221T>A	p.V74D	COSM17715	13	Substitution - Missense
74	c.221T>C	p.V74A	COSM17697	1	Substitution - Missense
74	c.221T>G	p.V74G	COSM3364888	5	Substitution - Missense
74	c.221_222delinsAT	p.V74D	COSM479168	1	Substitution - Missense
74	c.221_229del	p.V74_C77delinsG	COSM6023881	1	Deletion - In frame
74	c.221_230del	p.V74Afs*82	COSM17682	1	Deletion - Frameshift
74	c.221_245del	p.V74Afs*77	COSM17873	1	Deletion - Frameshift
74	c.221del	p.V74Afs*85	COSM4186011	3	Deletion - Frameshift
74	c.222C>T	p.V74=	COSM479169	1	Substitution - coding silent
74	c.?	p.V74D	COSM5757605	1	Substitution - Missense
74	c.?	p.V74G	COSM97122	2	Substitution - Missense
75	c.222_229del	p.I75Qfs*54	COSM423178	1	Deletion - Frameshift
75	c.223A>G	p.I75V	COSM6834748	1	Substitution - Missense
75	c.223dup	p.I75Nfs*57	COSM18283	1	Insertion - Frameshift
75	c.224_232del	p.I75_C77del	COSM6942010	1	Deletion - In frame
75	c.224del	p.I75Tfs*84	COSM98465	2	Deletion - Frameshift
75	c.225_251del	p.I75_V84delinsM	COSM98466	1	Deletion - In frame
76	c.225_226del	p.F76Lfs*55	COSM1651599	1	Deletion - Frameshift
76	c.225_228del	p.F76Afs*82	COSM3727791	1	Deletion - Frameshift
76	c.225_235delinsT	p.F76Afs*80	COSM28438	1	Complex - frameshift
76	c.225dup	p.F76Lfs*56	COSM6023883	1	Insertion - Frameshift
76	c.226_227insG	p.F76Cfs*56	COSM98467	1	Insertion - Frameshift
76	c.226_235del	p.F76Afs*80	COSM36337	2	Deletion - Frameshift
76	c.227T>A	p.F76Y	COSM14321	1	Substitution - Missense
76	c.227T>C	p.F76S	COSM34007	2	Substitution - Missense
76	c.227_228insAA	p.F76Lfs*84	COSM18345	1	Insertion - Frameshift
76	c.227_229del	p.F76del	COSM25687	29	Deletion - In frame
76	c.227_235del	p.F76_R79delinsC	COSM7253209	1	Deletion - In frame
76	c.227_321del	p.F76Sfs*24	COSM4770221	1	Deletion - Frameshift
76	c.227del	p.F76Sfs*83	COSM17716	6	Deletion - Frameshift
76	c.228C>A	p.F76L	COSM18084	1	Substitution - Missense
76	c.228_235del	p.F76Lfs*53	COSM7253483	1	Deletion - Frameshift
76	c.228_236delinsGA	p.F76Lfs*81	COSM36353	1	Complex - frameshift
77	c.227dup	p.C77Lfs*55	COSM1731988	1	Insertion - Frameshift
77	c.228_229insA	p.C77Mfs*55	COSM1731989	1	Insertion - Frameshift
77	c.228del	p.C77Afs*82	COSM1731990	2	Deletion - Frameshift
77	c.229T>A	p.C77S	COSM14322	1	Substitution - Missense
77	c.229_237del	p.C77_R79del	COSM18257	1	Deletion - In frame
77	c.230_231del	p.C77*	COSM1731991	1	Insertion - Frameshift
77	c.230_232del	p.C77_N78delinsY	COSM17638	1	Deletion - In frame
77	c.230_234del	p.C77Sfs*53	COSM34000	1	Deletion - Frameshift
77	c.230dup	p.C77Wfs*55	COSM17874	1	Insertion - Frameshift
77	c.231C>A	p.C77*	COSM14318	9	Substitution - Nonsense
77	c.231_232del	p.C77*	COSM17717	1	Insertion - Frameshift
77	c.231_244del	p.C77Wfs*50	COSM6023884	1	Deletion - Frameshift
78	c.224_231dup	p.N78Sfs*84	COSM1757312	1	Insertion - Frameshift
78	c.232A>C	p.N78H	COSM18086	2	Substitution - Missense
78	c.232A>G	p.N78D	COSM18275	4	Substitution - Missense
78	c.232A>T	p.N78Y	COSM34008	5	Substitution - Missense
78	c.232_233del	p.N78Sfs*53	COSM307755	1	Deletion - Frameshift
78	c.232_233insCAAA	p.N78Tfs*55	COSM7254136	2	Insertion - Frameshift
78	c.232_234dup	p.N78dup	COSM33994	1	Insertion - In frame
78	c.233A>C	p.N78T	COSM14319	3	Substitution - Missense
78	c.233A>G	p.N78S	COSM17855	14	Substitution - Missense
78	c.233A>T	p.N78I	COSM14320	4	Substitution - Missense
78	c.233_234del	p.N78Tfs*53	COSM423179	1	Deletion - Frameshift
78	c.233_243del	p.N78Tfs*50	COSM249301	1	Deletion - Frameshift
78	c.233del	p.N78Ifs*81	COSM18388	1	Deletion - Frameshift
78	c.233dup	p.N78Kfs*54	COSM18383	4	Insertion - Frameshift
78	c.234T>A	p.N78K	COSM18194	7	Substitution - Missense
78	c.234T>G	p.N78K	COSM17875	7	Substitution - Missense
78	c.234_237del	p.N78Kfs*80	COSM17718	1	Deletion - Frameshift
78	c.?	p.N78D	COSM5006569	3	Substitution - Missense
78	c.?	p.N78S	COSM1570298	5	Substitution - Missense
78	c.?	p.N78Y	COSM5006572	3	Substitution - Missense
79	c.234_235insA	p.R79Tfs*53	COSM3734680	1	Insertion - Frameshift
79	c.234_235insAATAT	p.R79Nfs*82	COSM7253345	1	Insertion - Frameshift
79	c.234del	p.R79Afs*80	COSM33997	1	Deletion - Frameshift
79	c.234dup	p.R79Sfs*53	COSM1731992	1	Insertion - Frameshift
79	c.235del	p.R79Afs*80	COSM17876	1	Deletion - Frameshift
79	c.236G>A	p.R79H	COSM18372	1	Substitution - Missense
79	c.236G>C	p.R79P	COSM3364889	3	Substitution - Missense
79	c.236_237del	p.R79Qfs*52	COSM17719	1	Deletion - Frameshift
79	c.236_237delinsCA	p.R79P	COSM17950	1	Substitution - Missense
79	c.236_241del	p.R79_S80del	COSM26602	2	Deletion - In frame
79	c.237C>G	p.R79=	COSM14350	1	Substitution - coding silent
80	c.212_237dup	p.S80Pfs*88	COSM17877	1	Insertion - Frameshift
80	c.220_239dup	p.S80Rfs*86	COSM1757311	2	Insertion - Frameshift
80	c.237del	p.S80Vfs*79	COSM6023872	1	Deletion - Frameshift
80	c.238A>C	p.S80R	COSM53187	4	Substitution - Missense
80	c.238_239delinsTT	p.S80F	COSM1757309	1	Substitution - Missense
80	c.238_244del	p.S80Afs*77	COSM6834746	1	Deletion - Frameshift
80	c.238_256del	p.S80Pfs*73	COSM17846	1	Deletion - Frameshift
80	c.239G>A	p.S80N	COSM30216	16	Substitution - Missense
80	c.239G>T	p.S80I	COSM3364919	1	Substitution - Missense
80	c.239_241del	p.S80_P81delinsT	COSM17720	1	Deletion - In frame
80	c.240T>A	p.S80R	COSM14290	16	Substitution - Missense
80	c.240T>G	p.S80R	COSM34029	9	Substitution - Missense
80	c.?	p.S80R	COSM5006573	5	Substitution - Missense
81	c.237_238del	p.P81Afs*50	COSM6023877	1	Deletion - Frameshift
81	c.238_239del	p.P81Afs*50	COSM98469	11	Deletion - Frameshift
81	c.240_248del	p.P81_V83del	COSM7254276	1	Deletion - In frame
81	c.241C>A	p.P81T	COSM97092	1	Substitution - Missense
81	c.241C>T	p.P81S	COSM17721	14	Substitution - Missense
81	c.242C>T	p.P81L	COSM1757300	1	Substitution - Missense
81	c.242_244del	p.P81del	COSM7253727	1	Deletion - In frame
81	c.242_246del	p.P81Rfs*49	COSM423180	1	Deletion - Frameshift
81	c.242del	p.P81Rfs*78	COSM17639	3	Deletion - Frameshift
82	c.242_243insA	p.R82Afs*50	COSM8661027	1	Insertion - Frameshift
82	c.243dup	p.R82Afs*50	COSM3736925	1	Insertion - Frameshift
82	c.244C>T	p.R82C	COSM18358	1	Substitution - Missense
82	c.244_247del	p.R82Sfs*76	COSM1731993	1	Deletion - Frameshift
82	c.244_250del	p.R82Cfs*75	COSM253343	1	Deletion - Frameshift
82	c.244del	p.R82Afs*77	COSM17675	1	Deletion - Frameshift
82	c.245G>C	p.R82P	COSM14382	5	Substitution - Missense
82	c.245_246delinsCT	p.R82P	COSM6923399	2	Substitution - Missense
83	c.243_247del	p.V83Afs*47	COSM18211	1	Deletion - Frameshift
83	c.245_246insT	p.V83Rfs*49	COSM6945440	1	Insertion - Frameshift
83	c.246_247del	p.V83Rfs*48	COSM253344	1	Deletion - Frameshift
83	c.246_254del	p.V83_L85del	COSM17878	1	Deletion - In frame
83	c.246_259del	p.V83Mfs*44	COSM7253970	1	Deletion - Frameshift
83	c.247G>A	p.V83I	COSM36212	1	Substitution - Missense
83	c.247_248del	p.V83Rfs*48	COSM7254028	1	Deletion - Frameshift
83	c.247del	p.V83Sfs*76	COSM249550	1	Deletion - Frameshift
83	c.248_255del	p.V83Afs*46	COSM36352	1	Deletion - Frameshift
84	c.248_249insAT	p.V84Sfs*76	COSM4189176	1	Insertion - Frameshift
84	c.249_250del	p.V84Afs*47	COSM17951	1	Deletion - Frameshift
84	c.249_251del	p.V84del	COSM9994701	1	Deletion - In frame
84	c.250G>C	p.V84L	COSM236660	1	Substitution - Missense
84	c.250_253del	p.V84Cfs*74	COSM18193	2	Deletion - Frameshift
84	c.250_256del	p.V84Pfs*73	COSM14411	1	Deletion - Frameshift
84	c.251T>A	p.V84E	COSM97140	2	Substitution - Missense
84	c.251_280del	p.V84_G93del	COSM30259	1	Deletion - In frame
85	c.252_260del	p.L85_V87del	COSM253345	1	Deletion - In frame
85	c.252del	p.L85Cfs*74	COSM36343	2	Deletion - Frameshift
85	c.253_260del	p.L85Mfs*44	COSM253346	1	Deletion - Frameshift
85	c.253del	p.L85Cfs*74	COSM18137	2	Deletion - Frameshift
85	c.254T>C	p.L85P	COSM17859	8	Substitution - Missense
85	c.254_262del	p.L85_W88delinsR	COSM6506453	2	Deletion - In frame
86	c.255_256del	p.P86Rfs*45	COSM18158	1	Deletion - Frameshift
86	c.256C>A	p.P86T	COSM97141	6	Substitution - Missense
86	c.256C>G	p.P86A	COSM36324	1	Substitution - Missense
86	c.256C>T	p.P86S	COSM18350	10	Substitution - Missense
86	c.256_259del	p.P86Yfs*72	COSM17879	2	Deletion - Frameshift
86	c.257C>A	p.P86H	COSM14405	7	Substitution - Missense
86	c.257C>G	p.P86R	COSM30234	2	Substitution - Missense
86	c.257C>T	p.P86L	COSM18028	7	Substitution - Missense
86	c.257_258delinsT	p.P86Lfs*73	COSM6834738	1	Complex - frameshift
86	c.257_267del	p.P86Qfs*42	COSM4770218	1	Deletion - Frameshift
86	c.257_277del	p.P86_G93delinsR	COSM9517903	1	Deletion - In frame
86	c.?	p.P86H	COSM5030937	1	Substitution - Missense
87	c.254_258dup	p.V87Cfs*74	COSM8659779	1	Insertion - Frameshift
87	c.257_258insT	p.V87Rfs*45	COSM423305	1	Insertion - Frameshift
87	c.258_259del	p.V87Mfs*44	COSM17683	1	Deletion - Frameshift
87	c.258del	p.V87Yfs*72	COSM25686	5	Deletion - Frameshift
87	c.258dup	p.V87Rfs*45	COSM6506451	2	Insertion - Frameshift
87	c.259G>A	p.V87I	COSM1757301	1	Substitution - Missense
87	c.259G>T	p.V87L	COSM7253973	1	Substitution - Missense
87	c.259_264del	p.V87_W88del	COSM14349	2	Deletion - In frame
87	c.260_262del	p.V87_W88delinsG	COSM18027	1	Deletion - In frame
87	c.260del	p.V87Dfs*72	COSM17880	2	Deletion - Frameshift
88	c.260_261insGTT	p.V87_W88insL	COSM7253890	1	Insertion - In frame
88	c.260dup	p.W88Mfs*44	COSM98470	1	Insertion - Frameshift
88	c.261_262del	p.W88Afs*43	COSM34004	2	Deletion - Frameshift
88	c.261_262dup	p.W88Yfs*72	COSM7253344	1	Insertion - Frameshift
88	c.261_262insGGCTCAAC	p.W88Gfs*74	COSM3734684	1	Insertion - Frameshift
88	c.261_271del	p.W88Rfs*40	COSM6834745	1	Deletion - Frameshift
88	c.262T>A	p.W88R	COSM17881	7	Substitution - Missense
88	c.262T>C	p.W88R	COSM17953	7	Substitution - Missense
88	c.262T>G	p.W88G	COSM253348	3	Substitution - Missense
88	c.262_263insAAT	p.V87_W88ins*	COSM6944693	1	Insertion - In frame
88	c.262_263insCGGCT	p.W88Sfs*73	COSM1169655	1	Insertion - Frameshift
88	c.263G>A	p.W88*	COSM18070	14	Substitution - Nonsense
88	c.263G>C	p.W88S	COSM18415	1	Substitution - Missense
88	c.263G>T	p.W88L	COSM18351	13	Substitution - Missense
88	c.263_264insTGGG	p.W88Cfs*45	COSM7254473	1	Insertion - Frameshift
88	c.263_270del	p.W88Ffs*41	COSM1757304	1	Deletion - Frameshift
88	c.264G>A	p.W88*	COSM249280	5	Substitution - Nonsense
88	c.264G>C	p.W88C	COSM17807	3	Substitution - Missense
88	c.264G>T	p.W88C	COSM97142	4	Substitution - Missense
88	c.264del	p.W88Cfs*71	COSM26785	2	Deletion - Frameshift
88	c.?	p.W88*	COSM5757608	1	Substitution - Nonsense
88	c.?	p.W88X*44	COSM6503285	1	Frameshift
89	c.264_265insA	p.L89Tfs*43	COSM9999624	1	Insertion - Frameshift
89	c.264dup	p.L89Afs*43	COSM423290	1	Insertion - Frameshift
89	c.265_274del	p.L89Tfs*67	COSM253349	1	Deletion - Frameshift
89	c.266T>A	p.L89H	COSM14305	33	Substitution - Missense
89	c.266T>C	p.L89P	COSM14346	10	Substitution - Missense
89	c.266T>G	p.L89R	COSM14404	5	Substitution - Missense
90	c.267_268insTA	p.N90*	COSM6506632	1	Insertion - Frameshift
90	c.267_271del	p.N90Rfs*40	COSM98471	1	Deletion - Frameshift
90	c.267_292del	p.N90Pfs*33	COSM6834734	1	Deletion - Frameshift
90	c.268A>T	p.N90Y	COSM17640	2	Substitution - Missense
90	c.268_270del	p.N90del	COSM17723	1	Deletion - In frame
90	c.268_273del	p.N90_F91del	COSM6506454	1	Deletion - In frame
90	c.269A>T	p.N90I	COSM14390	12	Substitution - Missense
90	c.269_275del	p.N90Tfs*67	COSM17724	1	Deletion - Frameshift
90	c.269del	p.N90Tfs*69	COSM17882	4	Deletion - Frameshift
90	c.270_280del	p.N90Kfs*38	COSM18044	1	Deletion - Frameshift
90	c.270_281del	p.N90_E94delinsK	COSM6834736	1	Deletion - In frame
90	c.?	p.N90Y	COSM5757609	1	Substitution - Missense
91	c.270del	p.F91Sfs*68	COSM4411218	8	Deletion - Frameshift
91	c.271T>C	p.F91L	COSM18061	1	Substitution - Missense
91	c.271_273del	p.F91del	COSM17725	3	Deletion - In frame
91	c.272_280del	p.F91_E94delins*	COSM98473	1	Deletion - In frame
91	c.272_284del	p.F91Cfs*64	COSM253350	1	Deletion - Frameshift
91	c.272del	p.F91Sfs*68	COSM34006	3	Deletion - Frameshift
91	c.273_274del	p.F91Lfs*40	COSM3358435	1	Deletion - Frameshift
91	c.273_281del	p.F91_E94delinsL	COSM253351	1	Deletion - In frame
91	c.273del	p.F91Lfs*68	COSM423183	2	Deletion - Frameshift
92	c.272dup	p.D92Rfs*40	COSM98474	1	Insertion - Frameshift
92	c.274G>A	p.D92N	COSM17838	1	Substitution - Missense
92	c.274G>T	p.D92Y	COSM17726	1	Substitution - Missense
92	c.274_278del	p.D92Rfs*38	COSM36351	1	Deletion - Frameshift
92	c.275A>G	p.D92G	COSM6962449	1	Substitution - Missense
92	c.275_276insGG	p.D92Efs*68	COSM253352	1	Insertion - Frameshift
92	c.275_277del	p.D92del	COSM26600	1	Deletion - In frame
92	c.275_278del	p.D92Afs*66	COSM6951773	1	Deletion - Frameshift
92	c.275_282delinsT	p.D92Vfs*65	COSM30342	1	Complex - frameshift
92	c.275_285del	p.D92Afs*36	COSM98479	2	Deletion - Frameshift
92	c.275del	p.D92Afs*67	COSM18066	1	Deletion - Frameshift
92	c.276_279del	p.D92Efs*66	COSM98480	1	Deletion - Frameshift
92	c.?	p.D92Xfs*36	COSM1570321	1	Frameshift
93	c.277G>C	p.G93R	COSM18080	1	Substitution - Missense
93	c.278G>A	p.G93D	COSM97143	1	Substitution - Missense
93	c.278G>T	p.G93V	COSM3364920	3	Substitution - Missense
93	c.278_280del	p.G93del	COSM1169460	1	Deletion - In frame
93	c.278del	p.G93Afs*66	COSM17883	2	Deletion - Frameshift
93	c.279C>G	p.G93=	COSM98481	1	Substitution - coding silent
94	c.279_280del	p.E94Afs*37	COSM17884	1	Deletion - Frameshift
94	c.279_280dup	p.E94Afs*66	COSM18196	1	Insertion - Frameshift
94	c.280G>A	p.E94K	COSM3734682	2	Substitution - Missense
94	c.280G>T	p.E94*	COSM30220	6	Substitution - Nonsense
94	c.280_281insGACG	p.E94Gfs*39	COSM34012	1	Insertion - Frameshift
94	c.281_291del	p.E94Vfs*34	COSM18131	1	Deletion - Frameshift
94	c.281del	p.E94Gfs*65	COSM4187807	1	Deletion - Frameshift
94	c.282_283del	p.E94Dfs*37	COSM3734695	1	Deletion - Frameshift
94	c.282_291del	p.E94Dfs*62	COSM26601	1	Deletion - Frameshift
94	c.282del	p.E94Dfs*65	COSM3736924	1	Deletion - Frameshift
95	c.281_282insACAA	p.P95Qfs*38	COSM17993	1	Insertion - Frameshift
95	c.283_297del	p.P95_P99del	COSM17709	1	Deletion - In frame
95	c.284C>A	p.P95Q	COSM3364890	1	Substitution - Missense
95	c.284C>G	p.P95R	COSM17699	2	Substitution - Missense
95	c.284_291del	p.P95Lfs*34	COSM6971961	1	Deletion - Frameshift
95	c.285G>A	p.P95=	COSM17955	1	Substitution - coding silent
96	c.281_285dup	p.Q96Sfs*65	COSM423291	1	Insertion - Frameshift
96	c.284_285insA	p.Q96Afs*36	COSM30485	1	Insertion - Frameshift
96	c.285_286insA	p.Q96Tfs*36	COSM17863	1	Insertion - Frameshift
96	c.285_291del	p.Q96Tfs*61	COSM18011	1	Deletion - Frameshift
96	c.285del	p.Q96Sfs*63	COSM4770216	1	Deletion - Frameshift
96	c.285dup	p.Q96Afs*36	COSM1169654	1	Insertion - Frameshift
96	c.286C>T	p.Q96*	COSM17658	14	Substitution - Nonsense
96	c.286del	p.Q96Sfs*63	COSM34017	1	Deletion - Frameshift
96	c.287A>C	p.Q96P	COSM144717	3	Substitution - Missense
96	c.287_289del	p.Q96del	COSM18156	1	Deletion - In frame
96	c.287_291del	p.Q96Lfs*34	COSM27566	1	Deletion - Frameshift
96	c.287_305del	p.Q96Rfs*57	COSM7253813	1	Deletion - Frameshift
96	c.287del	p.Q96Rfs*63	COSM1757305	1	Deletion - Frameshift
96	c.288G>T	p.Q96H	COSM17731	1	Substitution - Missense
96	c.288_291del	p.Q96Hfs*62	COSM17730	1	Deletion - Frameshift
96	c.288del	p.Q96Hfs*63	COSM98482	1	Deletion - Frameshift
96	c.?	p.Q96fs*?	COSM5757601	1	Frameshift
97	c.287dup	p.P97Afs*35	COSM6962904	1	Insertion - Frameshift
97	c.290_291del	p.P97Lfs*34	COSM18139	1	Deletion - Frameshift
97	c.290_299del	p.P97Rfs*59	COSM18128	1	Deletion - Frameshift
97	c.291C>A	p.P97=	COSM17689	1	Substitution - coding silent
97	c.291C>T	p.P97=	COSM17732	1	Substitution - coding silent
98	c.291_310del	p.Y98Hfs*27	COSM17686	1	Deletion - Frameshift
98	c.291del	p.Y98Tfs*61	COSM17956	3	Deletion - Frameshift
98	c.292T>A	p.Y98N	COSM14395	2	Substitution - Missense
98	c.292T>G	p.Y98D	COSM17957	1	Substitution - Missense
98	c.292_296del	p.Y98Nfs*32	COSM30274	2	Deletion - Frameshift
98	c.293A>T	p.Y98F	COSM17885	3	Substitution - Missense
98	c.293del	p.Y98Sfs*61	COSM14360	1	Deletion - Frameshift
98	c.293dup	p.Y98*	COSM423292	1	Insertion - Frameshift
98	c.294C>A	p.Y98*	COSM17958	7	Substitution - Nonsense
98	c.294C>G	p.Y98*	COSM14325	5	Substitution - Nonsense
98	c.?	p.Y98*	COSM1570307	1	Substitution - Nonsense
98	c.?	p.Y98N	COSM1570312	1	Substitution - Missense
99	c.295C>G	p.P99A	COSM9993895	1	Substitution - Missense
99	c.296C>T	p.P99L	COSM30238	1	Substitution - Missense
99	c.296_297del	p.P99Hfs*32	COSM423184	2	Deletion - Frameshift
99	c.296_305del	p.P99Rfs*57	COSM9995284	1	Deletion - Frameshift
99	c.296del	p.P99Qfs*60	COSM17886	12	Deletion - Frameshift
99	c.?	p.P99Xfs*60	COSM1570318	1	Frameshift
100	c.298A>G	p.T100A	COSM17856	1	Substitution - Missense
100	c.298_299del	p.T100Afs*31	COSM3358436	1	Deletion - Frameshift
100	c.298_299insACAA	p.T100Nfs*33	COSM17671	1	Insertion - Frameshift
100	c.298_313del	p.T100Rfs*54	COSM10046307	1	Deletion - Frameshift
100	c.298del	p.T100Rfs*59	COSM253354	3	Deletion - Frameshift
100	c.299del	p.T100Sfs*59	COSM98483	1	Deletion - Frameshift
100	c.?	p.T100Xfs*59	COSM1570320	1	Frameshift
101	c.299_300insT	p.L101Afs*31	COSM17887	1	Insertion - Frameshift
101	c.300_301del	p.L101Afs*30	COSM30256	2	Deletion - Frameshift
101	c.300_301delinsT	p.L101Cfs*58	COSM34001	1	Complex - frameshift
101	c.300_318del	p.L101Afs*52	COSM18045	1	Deletion - Frameshift
101	c.301C>T	p.L101=	COSM14348	2	Substitution - coding silent
101	c.301_316del	p.L101Afs*53	COSM6503489	1	Deletion - Frameshift
101	c.301del	p.L101Cfs*58	COSM9996946	1	Deletion - Frameshift
101	c.302T>C	p.L101P	COSM18255	5	Substitution - Missense
101	c.302T>G	p.L101R	COSM6918107	1	Substitution - Missense
101	c.302_304del	p.L101del	COSM17733	1	Deletion - In frame
101	c.302_304delinsCTA	p.L101_P102delinsPT	COSM6924681	2	Substitution - Missense
101	c.302_305del	p.L101Rfs*57	COSM26003	1	Deletion - Frameshift
101	c.302_307del	p.L101_P102del	COSM34022	1	Deletion - In frame
101	c.303_304ins?	p.?	COSM18046	1	Unknown
101	c.?	p.L101P	COSM1570308	1	Substitution - Missense
102	c.303_321del	p.P102Afs*51	COSM1169452	1	Deletion - Frameshift
102	c.304C>G	p.P102A	COSM17734	1	Substitution - Missense
102	c.304_316del	p.P102Afs*53	COSM7253621	1	Deletion - Frameshift
102	c.305_312del	p.P102Hfs*27	COSM18126	1	Deletion - Frameshift
102	c.?	p.P102_P103del	COSM144158	1	Deletion - In frame
103	c.306_308del	p.P103del	COSM17736	1	Deletion - In frame
103	c.306del	p.P103Lfs*56	COSM17888	1	Deletion - Frameshift
103	c.308_312del	p.P103Hfs*27	COSM17641	1	Deletion - Frameshift
103	c.308del	p.P103Lfs*56	COSM253355	1	Deletion - Frameshift
104	c.309_322del	p.G104Hfs*23	COSM17994	1	Deletion - Frameshift
104	c.309del	p.G104Afs*55	COSM14386	3	Deletion - Frameshift
104	c.310_326del	p.G104Pfs*22	COSM18016	1	Deletion - Frameshift
104	c.311_320del	p.G104Afs*52	COSM253356	1	Deletion - Frameshift
104	c.311del	p.G104Afs*55	COSM14393	6	Deletion - Frameshift
105	c.309_313del	p.T105Pfs*25	COSM3358438	1	Deletion - Frameshift
105	c.309_314dup	p.T105_G106dup	COSM17889	1	Insertion - In frame
105	c.313A>C	p.T105P	COSM18064	1	Substitution - Missense
105	c.314C>G	p.T105R	COSM7253604	1	Substitution - Missense
105	c.314C>T	p.T105M	COSM17737	1	Substitution - Missense
105	c.314del	p.T105Rfs*54	COSM14347	1	Deletion - Frameshift
106	c.315_318del	p.G106Afs*52	COSM6506456	1	Deletion - Frameshift
106	c.315_330del	p.G106Afs*48	COSM18279	2	Deletion - Frameshift
106	c.316_317del	p.G106Pfs*25	COSM98484	1	Deletion - Frameshift
106	c.316_333del	p.G106_S111del	COSM7254193	1	Deletion - In frame
106	c.317G>C	p.G106A	COSM17839	1	Substitution - Missense
106	c.317_323del	p.G106Afs*51	COSM18284	1	Deletion - Frameshift
106	c.317del	p.G106Afs*53	COSM17890	7	Deletion - Frameshift
107	c.302_318dup	p.R107Cfs*58	COSM423293	1	Insertion - Frameshift
107	c.314_315insA	p.R107Pfs*25	COSM6506455	1	Insertion - Frameshift
107	c.319C>G	p.R107G	COSM3364921	1	Substitution - Missense
107	c.319_340del	p.R107Vfs*45	COSM99127	1	Deletion - Frameshift
107	c.319del	p.R107Afs*52	COSM17891	1	Deletion - Frameshift
107	c.320G>C	p.R107P	COSM422837	5	Substitution - Missense
107	c.320_321delinsCA	p.R107P	COSM36362	1	Substitution - Missense
107	c.320_323del	p.R107Pfs*51	COSM18077	1	Deletion - Frameshift
107	c.320del	p.R107Pfs*52	COSM17849	2	Deletion - Frameshift
107	c.?	p.R107Xfs*45	COSM1570323	1	Frameshift
108	c.320_321dup	p.R108Afs*52	COSM253357	1	Insertion - Frameshift
108	c.321_322insTTCG	p.R108Ffs*25	COSM30323	1	Insertion - Frameshift
108	c.322_324del	p.R108del	COSM17738	1	Deletion - In frame
108	c.322del	p.R108Afs*51	COSM14326	4	Deletion - Frameshift
108	c.322dup	p.R108Pfs*24	COSM99128	1	Insertion - Frameshift
108	c.324C>A	p.R108=	COSM17740	1	Substitution - coding silent
108	c.(322_324)ins(20)	p.R108Xfs*?	COSM6506452	1	Insertion - Frameshift
109	c.324_325insGCATCATC	p.I109Afs*53	COSM7253537	1	Insertion - Frameshift
109	c.324_338del	p.I109_R113del	COSM53184	1	Deletion - In frame
109	c.324del	p.I109Sfs*50	COSM17741	3	Deletion - Frameshift
109	c.325_326insCTGGCACGGGCCGCCGC	p.I109Tfs*56	COSM423294	1	Insertion - Frameshift
109	c.325_333del	p.I109_S111del	COSM6953953	1	Deletion - In frame
109	c.325_333dup	p.I109_S111dup	COSM9645703	1	Insertion - In frame
109	c.325del	p.I109Sfs*50	COSM4770214	2	Deletion - Frameshift
109	c.326T>A	p.I109N	COSM30221	6	Substitution - Missense
109	c.326T>G	p.I109S	COSM30224	2	Substitution - Missense
110	c.327_328insA	p.H110Tfs*22	COSM6506457	1	Insertion - Frameshift
110	c.328C>A	p.H110N	COSM1731995	1	Substitution - Missense
110	c.328C>T	p.H110Y	COSM3364891	1	Substitution - Missense
110	c.328_333del	p.H110_S111del	COSM17742	1	Deletion - In frame
110	c.328del	p.H110Tfs*49	COSM18120	2	Deletion - Frameshift
110	c.329A>C	p.H110P	COSM30410	4	Substitution - Missense
110	c.329del	p.H110Pfs*49	COSM423187	1	Deletion - Frameshift
110	c.329dup	p.H110Qfs*22	COSM1169661	1	Insertion - Frameshift
110	c.330C>G	p.H110Q	COSM14306	1	Substitution - Missense
110	c.330_331del	p.H110Qfs*21	COSM7254114	1	Deletion - Frameshift
110	c.330_338del	p.H110_R113delinsQ	COSM7253203	1	Deletion - In frame
110	c.330del	p.H110Qfs*49	COSM17743	2	Deletion - Frameshift
111	c.326_329dup	p.S111Pfs*22	COSM99129	1	Insertion - Frameshift
111	c.328_331dup	p.S111Tfs*22	COSM17893	1	Insertion - Frameshift
111	c.330_331delinsT	p.S111Afs*48	COSM253358	1	Complex - frameshift
111	c.330_331dup	p.S111Tfs*49	COSM17892	2	Insertion - Frameshift
111	c.330_333del	p.S111Tfs*47	COSM6023875	1	Deletion - Frameshift
111	c.331A>C	p.S111R	COSM3734694	2	Substitution - Missense
111	c.331A>G	p.S111G	COSM18353	4	Substitution - Missense
111	c.331_333delinsCCT	p.S111P	COSM6959856	1	Substitution - Missense
111	c.331_336del	p.S111_Y112del	COSM36338	1	Deletion - In frame
111	c.331_340del	p.S111Vfs*45	COSM18048	1	Deletion - Frameshift
111	c.331del	p.S111Afs*48	COSM17744	5	Deletion - Frameshift
111	c.332G>A	p.S111N	COSM26151	13	Substitution - Missense
111	c.332G>T	p.S111I	COSM36341	4	Substitution - Missense
111	c.333C>A	p.S111R	COSM30226	13	Substitution - Missense
111	c.333C>G	p.S111R	COSM17894	8	Substitution - Missense
111	c.333C>T	p.S111=	COSM17806	1	Substitution - coding silent
111	c.?	p.S111R	COSM5757610	2	Substitution - Missense
112	c.333_334insA	p.Y112Ifs*20	COSM3358439	1	Insertion - Frameshift
112	c.333del	p.Y112Tfs*47	COSM17745	1	Deletion - Frameshift
112	c.334T>G	p.Y112D	COSM17746	3	Substitution - Missense
112	c.335A>G	p.Y112C	COSM6925019	1	Substitution - Missense
112	c.335dup	p.Y112*	COSM3358440	2	Insertion - Frameshift
112	c.336C>A	p.Y112*	COSM30227	3	Substitution - Nonsense
112	c.336_337del	p.Y112*	COSM10046299	4	Insertion - Frameshift
112	c.336_339del	p.Y112*	COSM7253561	1	Insertion - Frameshift
112	c.336_340del	p.Y112*	COSM26790	2	Insertion - Frameshift
112	c.?	p.Y112D	COSM1570309	1	Substitution - Missense
113	c.337C>T	p.R113*	COSM30228	9	Substitution - Nonsense
113	c.337del	p.R113Efs*46	COSM18012	1	Deletion - Frameshift
113	c.339A>T	p.R113=	COSM17747	2	Substitution - coding silent
114	c.339_340del	p.G114Sfs*17	COSM18149	1	Deletion - Frameshift
114	c.340G>A	p.G114S	COSM14384	2	Substitution - Missense
114	c.340G>C	p.G114R	COSM18065	8	Substitution - Missense
114	c.340G>T	p.G114C	COSM17642	9	Substitution - Missense
114	c.341-1_357dup	p.G114_F119dup	COSM1684705	1	Insertion - In frame
114	c.341G>A	p.G114D	COSM17936	2	Substitution - Missense
114	c.341G>C	p.G114A	COSM18346	8	Substitution - Missense
114	c.341del	p.G114Vfs*45	COSM9645686	1	Deletion - Frameshift
114	c.342T>G	p.G114=	COSM18088	1	Substitution - coding silent
114	c.?	p.G114V	COSM144157	1	Substitution - Missense
114	c.?	p.G114fs*?	COSM5757612	1	Frameshift
115	c.341dup	p.H115Sfs*17	COSM98485	2	Insertion - Frameshift
115	c.342_351del	p.H115Sfs*41	COSM17643	1	Deletion - Frameshift
115	c.342dup	p.H115Sfs*17	COSM1651653	1	Insertion - Frameshift
115	c.343C>A	p.H115N	COSM17752	19	Substitution - Missense
115	c.343C>G	p.H115D	COSM18195	1	Substitution - Missense
115	c.343C>T	p.H115Y	COSM14375	20	Substitution - Missense
115	c.343_347del	p.H115Lfs*15	COSM144718	1	Deletion - Frameshift
115	c.343_349del	p.H115Gfs*42	COSM17961	1	Deletion - Frameshift
115	c.343del	p.H115Tfs*44	COSM34025	1	Deletion - Frameshift
115	c.344A>C	p.H115P	COSM17962	1	Substitution - Missense
115	c.344A>G	p.H115R	COSM6196869	1	Substitution - Missense
115	c.344A>T	p.H115L	COSM97144	1	Substitution - Missense
115	c.344_345del	p.H115Pfs*16	COSM98486	1	Deletion - Frameshift
115	c.344_346del	p.H115del	COSM1169466	1	Deletion - In frame
115	c.344del	p.H115Pfs*44	COSM17678	2	Deletion - Frameshift
115	c.345C>A	p.H115Q	COSM1651696	2	Substitution - Missense
115	c.345C>G	p.H115Q	COSM6503490	3	Substitution - Missense
115	c.?	p.H115Xfs*17	COSM1570316	1	Frameshift
116	c.346C>G	p.L116V	COSM18067	1	Substitution - Missense
116	c.346_365del	p.L116Rfs*9	COSM6506458	1	Deletion - Frameshift
116	c.346del	p.L116Ffs*43	COSM17963	6	Deletion - Frameshift
116	c.346dup	p.L116Pfs*16	COSM308464	4	Insertion - Frameshift
116	c.348T>C	p.L116=	COSM479171	1	Substitution - coding silent
117	c.346_347del	p.W117Afs*14	COSM34028	2	Deletion - Frameshift
117	c.347_348insCTTT	p.W117Ffs*16	COSM7253829	1	Insertion - Frameshift
117	c.348_349del	p.W117Afs*14	COSM3358442	1	Deletion - Frameshift
117	c.348_349dup	p.W117Ffs*43	COSM10046323	3	Insertion - Frameshift
117	c.349T>A	p.W117R	COSM14385	1	Substitution - Missense
117	c.349T>C	p.W117R	COSM14310	5	Substitution - Missense
117	c.349T>G	p.W117G	COSM30297	3	Substitution - Missense
117	c.349_367del	p.W117Gfs*36	COSM1169469	1	Deletion - Frameshift
117	c.349del	p.W117Gfs*42	COSM18135	9	Deletion - Frameshift
117	c.349dup	p.W117Lfs*15	COSM98487	2	Insertion - Frameshift
117	c.350G>A	p.W117*	COSM17862	10	Substitution - Nonsense
117	c.350G>C	p.W117S	COSM97145	2	Substitution - Missense
117	c.350G>T	p.W117L	COSM18192	9	Substitution - Missense
117	c.350_356del	p.W117Sfs*40	COSM17753	1	Deletion - Frameshift
117	c.351G>A	p.W117*	COSM14399	7	Substitution - Nonsense
117	c.351G>C	p.W117C	COSM479172	2	Substitution - Missense
117	c.351G>T	p.W117C	COSM14328	4	Substitution - Missense
117	c.351del	p.W117Cfs*42	COSM17964	4	Deletion - Frameshift
117	c.?	p.W117C	COSM5006571	3	Substitution - Missense
117	c.?	p.W117R	COSM1570305	1	Substitution - Missense
118	c.351dup	p.L118Afs*14	COSM18150	1	Insertion - Frameshift
118	c.353T>A	p.L118H	COSM17754	1	Substitution - Missense
118	c.353T>C	p.L118P	COSM14312	12	Substitution - Missense
118	c.353T>G	p.L118R	COSM6506718	2	Substitution - Missense
118	c.353_360del	p.L118Rfs*11	COSM9517848	2	Deletion - Frameshift
118	c.354C>T	p.L118=	COSM6503488	1	Substitution - coding silent
119	c.354del	p.F119Sfs*40	COSM3734692	1	Deletion - Frameshift
119	c.355T>C	p.F119L	COSM1417294	1	Substitution - Missense
119	c.355_359del	p.F119Rfs*11	COSM17995	1	Deletion - Frameshift
119	c.356_360del	p.F119*	COSM1731997	1	Deletion - Frameshift
119	c.356del	p.F119Sfs*40	COSM1659439	2	Deletion - Frameshift
119	c.357C>A	p.F119L	COSM97146	2	Substitution - Missense
119	c.357C>G	p.F119L	COSM18022	3	Substitution - Missense
119	c.357_361del	p.F119Lfs*11	COSM4186068	1	Deletion - Frameshift
119	c.357del	p.F119Lfs*40	COSM18385	2	Deletion - Frameshift
119	c.?	p.F119L	COSM5757595	1	Substitution - Missense
120	c.358A>G	p.R120G	COSM479173	6	Substitution - Missense
120	c.358A>T	p.R120*	COSM18017	3	Substitution - Nonsense
120	c.359_362del	p.R120Mfs*38	COSM17670	1	Deletion - Frameshift
120	c.359_374del	p.R120Tfs*34	COSM30244	1	Deletion - Frameshift
120	c.359del	p.R120Kfs*39	COSM14403	2	Deletion - Frameshift
120	c.360_364del	p.R120Sfs*10	COSM423190	1	Deletion - Frameshift
120	c.?	p.R120fs*?	COSM5757606	1	Frameshift
121	c.360_361insT	p.D121*	COSM17966	1	Insertion - Frameshift
121	c.360_362dup	p.R120_D121insE	COSM7254081	1	Insertion - In frame
121	c.360del	p.D121Mfs*38	COSM423191	2	Deletion - Frameshift
121	c.360dup	p.D121Rfs*11	COSM18281	2	Insertion - Frameshift
121	c.361G>T	p.D121Y	COSM34019	13	Substitution - Missense
121	c.361_362del	p.D121Cfs*10	COSM17965	2	Deletion - Frameshift
121	c.361_370del	p.D121Hfs*35	COSM253363	1	Deletion - Frameshift
121	c.361del	p.D121Mfs*38	COSM423192	1	Deletion - Frameshift
121	c.362A>G	p.D121G	COSM18009	6	Substitution - Missense
121	c.362A>T	p.D121V	COSM1417296	1	Substitution - Missense
121	c.362_363insG	p.D121Efs*11	COSM30246	1	Insertion - Frameshift
121	c.362_364del	p.D121del	COSM98488	2	Deletion - In frame
121	c.362_367del	p.D121_A122del	COSM14394	1	Deletion - In frame
121	c.363T>G	p.D121E	COSM17644	2	Substitution - Missense
121	c.?	p.D121Xfs*38	COSM144159	1	Frameshift
122	c.360_367del	p.A122Tfs*7	COSM36355	2	Deletion - Frameshift
122	c.365C>A	p.A122E	COSM17967	2	Substitution - Missense
122	c.365_367del	p.A122del	COSM6834733	1	Deletion - In frame
123	c.366_367del	p.G123Dfs*8	COSM18111	1	Deletion - Frameshift
123	c.367_370del	p.G123Hfs*35	COSM6977124	1	Deletion - Frameshift
123	c.368G>A	p.G123E	COSM1757308	1	Substitution - Missense
123	c.368_369del	p.G123Dfs*8	COSM1169461	1	Deletion - Frameshift
124	c.369_370insC	p.T124Hfs*8	COSM4770220	1	Insertion - Frameshift
124	c.369_370insGGACACACGACACACGA	p.T124Gfs*41	COSM7253734	1	Insertion - Frameshift
124	c.369_371del	p.T124del	COSM25702	1	Deletion - In frame
124	c.369del	p.T124Hfs*35	COSM17895	11	Deletion - Frameshift
124	c.370A>G	p.T124A	COSM97147	1	Substitution - Missense
124	c.370_371insTGCAGGA	p.T124Mfs*10	COSM18146	1	Insertion - Frameshift
124	c.370del	p.T124Hfs*35	COSM18214	5	Deletion - Frameshift
124	c.371_378del	p.T124Rfs*5	COSM98490	1	Deletion - Frameshift
124	c.?	p.T124Xfs*5	COSM1570315	1	Frameshift
125	c.372del	p.H125Tfs*34	COSM36359	3	Deletion - Frameshift
125	c.373_374insT	p.H125Lfs*7	COSM1666089	1	Insertion - Frameshift
125	c.373del	p.H125Tfs*34	COSM18277	1	Deletion - Frameshift
125	c.374A>T	p.H125L	COSM1664946	1	Substitution - Missense
125	c.374_375del	p.H125Rfs*6	COSM17935	3	Deletion - Frameshift
125	c.374_380del	p.H125Rfs*32	COSM98491	1	Deletion - Frameshift
125	c.374del	p.H125Pfs*34	COSM6023764	1	Deletion - Frameshift
125	c.374dup	p.H125Qfs*7	COSM98493	1	Insertion - Frameshift
125	c.375C>T	p.H125=	COSM1684704	1	Substitution - coding silent
125	c.375_376del	p.H125Qfs*6	COSM30320	1	Deletion - Frameshift
125	c.375del	p.H125Qfs*34	COSM4186742	2	Deletion - Frameshift
126	c.374_375dup	p.D126Tfs*34	COSM423295	1	Insertion - Frameshift
126	c.374_375insT	p.D126Rfs*6	COSM4189185	1	Insertion - Frameshift
126	c.376G>A	p.D126N	COSM18060	1	Substitution - Missense
126	c.376_382del	p.D126Ffs*31	COSM7253313	1	Deletion - Frameshift
126	c.376del	p.D126Mfs*33	COSM6834739	2	Deletion - Frameshift
126	c.376dup	p.D126Gfs*6	COSM6506459	1	Insertion - Frameshift
126	c.377A>G	p.D126G	COSM14392	3	Substitution - Missense
126	c.377_380del	p.D126Gfs*32	COSM423194	1	Deletion - Frameshift
126	c.377_381del	p.D126Afs*4	COSM253364	2	Deletion - Frameshift
126	c.378T>A	p.D126E	COSM7253735	1	Substitution - Missense
126	c.378_379del	p.D126Efs*5	COSM17968	1	Deletion - Frameshift
126	c.378del	p.D126Efs*33	COSM17969	2	Deletion - Frameshift
126	c.?	p.D126fs*?	COSM5757591	1	Frameshift
127	c.378dup	p.G127Wfs*5	COSM17896	4	Insertion - Frameshift
127	c.380_381del	p.G127Afs*4	COSM17970	2	Deletion - Frameshift
128	c.381_382insA	p.L128Tfs*4	COSM18389	1	Insertion - Frameshift
128	c.381del	p.L128Ffs*31	COSM14415	9	Deletion - Frameshift
128	c.381dup	p.L128Afs*4	COSM14286	1	Insertion - Frameshift
128	c.382C>A	p.L128I	COSM17897	2	Substitution - Missense
128	c.382del	p.L128Ffs*31	COSM18049	1	Deletion - Frameshift
128	c.383T>A	p.L128H	COSM17756	6	Substitution - Missense
128	c.383T>C	p.L128P	COSM25719	11	Substitution - Missense
128	c.383T>G	p.L128R	COSM14362	3	Substitution - Missense
129	c.384_386del	p.L129del	COSM6951659	1	Deletion - In frame
129	c.384del	p.L129Wfs*30	COSM9645688	1	Deletion - Frameshift
129	c.384dup	p.L129Sfs*3	COSM423296	1	Insertion - Frameshift
129	c.385C>A	p.L129M	COSM3727795	1	Substitution - Missense
129	c.385_386del	p.L129Gfs*2	COSM1651606	1	Deletion - Frameshift
129	c.386T>C	p.L129P	COSM1417300	1	Substitution - Missense
129	c.386_393del	p.L129Pfs*3	COSM10046316	3	Deletion - Frameshift
129	c.387G>A	p.L129=	COSM30331	1	Substitution - coding silent
129	c.387G>T	p.L129=	COSM1417301	1	Substitution - coding silent
130	c.387_388delinsAT	p.V130F	COSM30352	1	Substitution - Missense
130	c.388G>A	p.V130I	COSM1757303	1	Substitution - Missense
130	c.388G>C	p.V130L	COSM14407	18	Substitution - Missense
130	c.388G>T	p.V130F	COSM97148	8	Substitution - Missense
130	c.388del	p.V130Lfs*29	COSM7253424	1	Deletion - Frameshift
130	c.388dup	p.V130Gfs*2	COSM4189211	2	Insertion - Frameshift
130	c.389T>A	p.V130D	COSM14323	5	Substitution - Missense
130	c.389_392del	p.V130Afs*28	COSM17899	1	Deletion - Frameshift
130	c.?	p.V130F	COSM1570302	1	Substitution - Missense
131	c.389_390insGTTT	p.N131Ffs*2	COSM7253706	2	Insertion - Frameshift
131	c.390del	p.N131Tfs*28	COSM17757	4	Deletion - Frameshift
131	c.390dup	p.N131*	COSM18286	2	Insertion - Frameshift
131	c.391A>T	p.N131Y	COSM17758	5	Substitution - Missense
131	c.391_398del	p.N131*	COSM17842	1	Deletion - Frameshift
131	c.392_408del	p.N131Sfs*7	COSM253366	1	Deletion - Frameshift
131	c.392del	p.N131Tfs*28	COSM14302	3	Deletion - Frameshift
131	c.392dup	p.N131Kfs*4	COSM98494	1	Insertion - Frameshift
131	c.393C>A	p.N131K	COSM1731999	2	Substitution - Missense
131	c.393C>G	p.N131K	COSM25720	3	Substitution - Missense
131	c.393_396del	p.N131Kfs*27	COSM17759	2	Deletion - Frameshift
131	c.393_400del	p.N131Kfs*10	COSM30268	1	Deletion - Frameshift
131	c.?	p.N131*	COSM5757600	1	Frameshift
131	c.?	p.N131Y	COSM144156	1	Substitution - Missense
132	c.393_394delinsT	p.Q132Kfs*27	COSM34027	1	Complex - frameshift
132	c.394C>T	p.Q132*	COSM14356	4	Substitution - Nonsense
132	c.394del	p.Q132Kfs*27	COSM98495	1	Deletion - Frameshift
132	c.395A>C	p.Q132P	COSM97149	1	Substitution - Missense
132	c.396A>T	p.Q132H	COSM6506717	2	Substitution - Missense
132	c.396_397del	p.Q132Hfs*2	COSM18354	1	Deletion - Frameshift
133	c.389_397dup	p.Q132_T133insINQ	COSM18342	1	Insertion - In frame
133	c.397A>C	p.T133P	COSM479174	1	Substitution - Missense
133	c.397A>T	p.T133S	COSM17645	1	Substitution - Missense
133	c.397del	p.T133Lfs*26	COSM17857	13	Deletion - Frameshift
133	c.397dup	p.T133Nfs*2	COSM253367	3	Insertion - Frameshift
133	c.398_401del	p.T133Nfs*25	COSM14420	1	Deletion - Frameshift
133	c.398del	p.T133Mfs*26	COSM98497	1	Deletion - Frameshift
133	c.?	p.T133fs*?	COSM5757597	1	Frameshift
134	c.395_398dup	p.E134Nfs*2	COSM6946891	1	Insertion - Frameshift
134	c.399_400del	p.E134Ifs*9	COSM17613	4	Deletion - Frameshift
134	c.399del	p.E134Nfs*25	COSM1665851	1	Deletion - Frameshift
134	c.400G>T	p.E134*	COSM14373	5	Substitution - Nonsense
134	c.400_403del	p.E134Yfs*24	COSM98498	1	Deletion - Frameshift
134	c.400_404del	p.E134Ifs*8	COSM7253715	1	Deletion - Frameshift
134	c.400_407del	p.E134Cfs*7	COSM423197	1	Deletion - Frameshift
134	c.400del	p.E134Nfs*25	COSM17900	1	Deletion - Frameshift
134	c.401A>C	p.E134A	COSM17901	1	Substitution - Missense
134	c.401_402insT	p.E134Dfs*10	COSM17646	1	Insertion - Frameshift
134	c.402_403del	p.E134Dfs*9	COSM6342255	4	Deletion - Frameshift
134	c.402_405del	p.E134Dfs*24	COSM308465	1	Deletion - Frameshift
134	c.402del	p.E134Dfs*25	COSM30353	6	Deletion - Frameshift
135	c.385_404dup	p.L135Ffs*31	COSM6506460	1	Insertion - Frameshift
135	c.402dup	p.L135Ifs*9	COSM98499	2	Insertion - Frameshift
135	c.403_404dup	p.L135Ffs*25	COSM9992030	1	Insertion - Frameshift
135	c.403_404insATTT	p.L135Yfs*10	COSM7253800	1	Insertion - Frameshift
135	c.404T>A	p.L135*	COSM33993	6	Substitution - Nonsense
135	c.404T>G	p.L135*	COSM26992	2	Substitution - Nonsense
135	c.404del	p.L135Yfs*24	COSM14406	5	Deletion - Frameshift
135	c.404dup	p.L135Ffs*9	COSM36346	3	Insertion - Frameshift
135	c.405A>T	p.L135F	COSM3364922	2	Substitution - Missense
135	c.405_406del	p.L135Ffs*8	COSM4187877	2	Deletion - Frameshift
135	c.405_407del	p.L135del	COSM7254321	1	Deletion - In frame
135	c.405_409del	p.L135Ffs*7	COSM18068	1	Deletion - Frameshift
135	c.405del	p.L135Ffs*24	COSM14279	4	Deletion - Frameshift
135	c.?	p.L135Xfs*158	COSM7455345	2	Frameshift
135	c.?	p.L135fs*?	COSM5757599	2	Frameshift
136	c.402_405dup	p.F136Ifs*9	COSM98500	1	Insertion - Frameshift
136	c.405_406insAA	p.F136Nfs*24	COSM6834751	2	Insertion - Frameshift
136	c.406T>A	p.F136I	COSM17669	2	Substitution - Missense
136	c.406T>G	p.F136V	COSM18276	5	Substitution - Missense
136	c.406_407insATAT	p.F136Yfs*9	COSM98501	1	Insertion - Frameshift
136	c.406_407insATTTT	p.F136Yfs*25	COSM7253750	2	Insertion - Frameshift
136	c.406_408del	p.F136del	COSM17760	1	Deletion - In frame
136	c.407T>A	p.F136Y	COSM18069	1	Substitution - Missense
136	c.407T>C	p.F136S	COSM17996	4	Substitution - Missense
136	c.407T>G	p.F136C	COSM17971	1	Substitution - Missense
136	c.407_408delinsG	p.F136Wfs*23	COSM34011	1	Complex - frameshift
136	c.407_408insG	p.F136Lfs*8	COSM17902	1	Insertion - Frameshift
136	c.407_410del	p.F136Cfs*22	COSM6834740	1	Deletion - Frameshift
136	c.408T>G	p.F136L	COSM17763	1	Substitution - Missense
136	c.408del	p.F136Lfs*23	COSM17764	9	Deletion - Frameshift
136	c.408delinsGA	p.F136Lfs*8	COSM18387	1	Complex - frameshift
136	c.?	p.F136Xfs*158	COSM7455344	2	Frameshift
136	c.?	p.F136fs*?	COSM5757592	2	Frameshift
137	c.407_408dup	p.V137Lfs*23	COSM30354	3	Insertion - Frameshift
137	c.408_409insTTTT	p.V137Ffs*8	COSM7720689	1	Insertion - Frameshift
137	c.408_409insTTTTTTT	p.V137Ffs*9	COSM9645689	1	Insertion - Frameshift
137	c.408dup	p.V137Cfs*7	COSM17929	8	Insertion - Frameshift
137	c.409G>A	p.V137M	COSM3727783	1	Substitution - Missense
137	c.409_415del	p.V137Lfs*20	COSM6023876	1	Deletion - Frameshift
137	c.409del	p.V137Cfs*22	COSM17765	2	Deletion - Frameshift
138	c.412C>T	p.P138S	COSM9521192	1	Substitution - Missense
138	c.412_425del	p.P138*	COSM249586	2	Deletion - Frameshift
138	c.412_427del	p.P138Tfs*16	COSM1169454	1	Deletion - Frameshift
138	c.413C>G	p.P138R	COSM14383	2	Substitution - Missense
138	c.413_414del	p.P138Lfs*5	COSM17766	1	Deletion - Frameshift
139	c.414del	p.S139Lfs*20	COSM17647	2	Deletion - Frameshift
139	c.415_420delinsAACCCTA	p.S139Nfs*5	COSM34023	1	Complex - frameshift
139	c.415del	p.S139Lfs*20	COSM3734690	1	Deletion - Frameshift
139	c.416_423del	p.S139Cfs*2	COSM307757	2	Deletion - Frameshift
139	c.416del	p.S139Ffs*20	COSM1651631	1	Deletion - Frameshift
139	c.417T>A	p.S139=	COSM17767	2	Substitution - coding silent
140	c.416dup	p.L140Sfs*4	COSM18148	2	Insertion - Frameshift
140	c.417del	p.L140Sfs*19	COSM3734713	1	Deletion - Frameshift
140	c.418_425del	p.L140*	COSM17768	1	Deletion - Frameshift
140	c.419_420del	p.L140Qfs*3	COSM17930	2	Deletion - Frameshift
140	c.419del	p.L140Pfs*19	COSM14398	1	Deletion - Frameshift
140	c.?	p.?fs	COSM18083	3	Deletion - Frameshift
141	c.416_417insCC	p.N141Sfs*19	COSM253370	1	Insertion - Frameshift
141	c.419_420ins44	p.N141Rfs*4	COSM6506494	1	Insertion - Frameshift
141	c.420del	p.N141Mfs*18	COSM18134	1	Deletion - Frameshift
141	c.420dup	p.N141Qfs*3	COSM1169660	1	Insertion - Frameshift
141	c.421_422insCAAA	p.N141Tfs*4	COSM7254102	1	Insertion - Frameshift
141	c.421_422insT	p.N141Ifs*3	COSM18390	1	Insertion - Frameshift
141	c.422A>G	p.N141S	COSM3734701	1	Substitution - Missense
141	c.422_423del	p.N141Sfs*2	COSM18122	1	Deletion - Frameshift
141	c.422_428del	p.N141Tfs*16	COSM17903	2	Deletion - Frameshift
141	c.422del	p.N141Mfs*18	COSM26787	11	Deletion - Frameshift
141	c.422dup	p.N141Kfs*3	COSM17904	6	Insertion - Frameshift
141	c.423_430del	p.N141Kfs*30	COSM25685	1	Deletion - Frameshift
141	c.423del	p.N141Kfs*18	COSM17648	3	Deletion - Frameshift
142	c.423_424insA	p.V142Sfs*2	COSM6506462	1	Insertion - Frameshift
142	c.424G>A	p.V142I	COSM1417312	1	Substitution - Missense
142	c.424_425del	p.V142*	COSM14333	1	Deletion - Frameshift
142	c.424_439del	p.V142Ffs*12	COSM98690	1	Deletion - Frameshift
142	c.424del	p.V142Lfs*17	COSM18051	3	Deletion - Frameshift
142	c.425_429del	p.V142Gfs*30	COSM14379	1	Deletion - Frameshift
142	c.426T>G	p.V142=	COSM17739	1	Substitution - coding silent
143	c.426del	p.D143Tfs*16	COSM18215	4	Deletion - Frameshift
143	c.426dup	p.D143*	COSM6023882	1	Insertion - Frameshift
143	c.427_431del	p.D143Tfs*29	COSM423200	1	Deletion - Frameshift
143	c.429del	p.D143Efs*16	COSM14409	2	Deletion - Frameshift
144	c.426_429del	p.G144Sfs*14	COSM14413	8	Deletion - Frameshift
144	c.430G>T	p.G144*	COSM25682	10	Substitution - Nonsense
144	c.430_431del	p.G144Tfs*29	COSM253371	1	Deletion - Frameshift
144	c.430_433del	p.G144Sfs*14	COSM18133	1	Deletion - Frameshift
144	c.430_461del	p.G144Sfs*19	COSM18112	1	Deletion - Frameshift
144	c.431del	p.G144Dfs*15	COSM14412	9	Deletion - Frameshift
144	c.?	p.G144fs*?	COSM5757588	1	Frameshift
145	c.430_433dup	p.Q145Rfs*30	COSM18136	1	Insertion - Frameshift
145	c.432del	p.Q145Sfs*14	COSM253372	1	Deletion - Frameshift
145	c.433C>T	p.Q145*	COSM97150	5	Substitution - Nonsense
145	c.433_439del	p.Q145Ffs*12	COSM14288	1	Deletion - Frameshift
145	c.434_457del	p.Q145_T152del	COSM7254062	1	Deletion - In frame
145	c.434del	p.Q145Rfs*14	COSM253373	2	Deletion - Frameshift
145	c.435G>T	p.Q145H	COSM18071	1	Substitution - Missense
145	c.435_449del	p.Q145_N150delinsH	COSM4186819	1	Deletion - In frame
145	c.435del	p.Q145Hfs*14	COSM6506463	1	Deletion - Frameshift
146	c.435_438del	p.P146Ffs*12	COSM14287	2	Deletion - Frameshift
146	c.436C>G	p.P146A	COSM33998	1	Substitution - Missense
146	c.437C>T	p.P146L	COSM6506464	1	Substitution - Missense
146	c.437_449del	p.P146Lfs*9	COSM3734706	1	Deletion - Frameshift
146	c.437_450del	p.P146Hfs*23	COSM17650	1	Deletion - Frameshift
146	c.437del	p.P146Lfs*13	COSM17649	5	Deletion - Frameshift
146	c.438T>C	p.P146=	COSM17974	2	Substitution - coding silent
147	c.438_453del	p.I147Hfs*7	COSM6947241	1	Deletion - Frameshift
147	c.438dup	p.I147Yfs*27	COSM5075579	3	Insertion - Frameshift
147	c.439_440del	p.I147Ffs*26	COSM249476	1	Deletion - Frameshift
147	c.439_440insAA	p.I147Kfs*13	COSM30351	1	Insertion - Frameshift
147	c.439_443del	p.I147Cfs*25	COSM17975	1	Deletion - Frameshift
147	c.439_444del	p.I147_F148del	COSM17972	1	Deletion - In frame
147	c.439_452del	p.I147Hfs*22	COSM7253774	1	Deletion - Frameshift
147	c.439del	p.I147Ffs*12	COSM17976	7	Deletion - Frameshift
147	c.439delinsTT	p.I147Ffs*27	COSM30349	1	Complex - frameshift
147	c.439dup	p.I147Nfs*27	COSM18256	1	Insertion - Frameshift
147	c.440_446del	p.I147Tfs*10	COSM17973	1	Deletion - Frameshift
147	c.441_444del	p.I147Mfs*11	COSM26791	2	Deletion - Frameshift
148	c.400_442dup	p.F148*	COSM6950532	1	Insertion - Frameshift
148	c.441delinsAA	p.F148Ifs*26	COSM253377	1	Complex - frameshift
148	c.442_444del	p.F148del	COSM253374	1	Deletion - In frame
148	c.443_444del	p.F148Cfs*25	COSM17868	2	Deletion - Frameshift
148	c.444_446delinsGG	p.F148Lfs*11	COSM674221	1	Complex - frameshift
148	c.444_450del	p.F148Lfs*9	COSM17905	1	Deletion - Frameshift
148	c.444del	p.F148Lfs*11	COSM14410	31	Deletion - Frameshift
149	c.440_441insATTTTTT	p.A149Ffs*27	COSM7253640	1	Insertion - Frameshift
149	c.443_444dup	p.A149Lfs*11	COSM253376	1	Insertion - Frameshift
149	c.443_444insC	p.A149Cfs*25	COSM18118	1	Insertion - Frameshift
149	c.444_445del	p.A149Qfs*24	COSM26792	3	Deletion - Frameshift
149	c.444dup	p.A149Cfs*25	COSM14285	14	Insertion - Frameshift
149	c.445G>C	p.A149P	COSM17651	2	Substitution - Missense
149	c.445del	p.A149Pfs*10	COSM1732000	1	Deletion - Frameshift
149	c.446C>A	p.A149D	COSM36360	2	Substitution - Missense
149	c.?	p.A149fs*?	COSM5757607	1	Frameshift
150	c.447_453del	p.N150Hfs*7	COSM18347	1	Deletion - Frameshift
150	c.447del	p.N150Ifs*9	COSM14422	2	Deletion - Frameshift
150	c.448_449insT	p.N150Ifs*24	COSM9645685	1	Insertion - Frameshift
150	c.449_450insAATATAT	p.N150Kfs*26	COSM7254212	1	Insertion - Frameshift
150	c.449_451del	p.N150del	COSM9989597	1	Deletion - In frame
150	c.449del	p.N150Ifs*9	COSM17843	2	Deletion - Frameshift
150	c.450_455del	p.N150_T152delinsK	COSM17906	1	Deletion - In frame
150	c.450del	p.N150Kfs*9	COSM17845	3	Deletion - Frameshift
151	c.450_451insTAT	p.N150_I151insY	COSM253378	1	Insertion - In frame
151	c.451A>T	p.I151F	COSM17978	2	Substitution - Missense
151	c.451_452del	p.I151Hfs*22	COSM10046294	3	Deletion - Frameshift
151	c.451_452delinsTA	p.I151Y	COSM479175	1	Substitution - Missense
151	c.451dup	p.I151Nfs*23	COSM17853	1	Insertion - Frameshift
151	c.452T>A	p.I151N	COSM18274	6	Substitution - Missense
151	c.452T>C	p.I151T	COSM17934	12	Substitution - Missense
151	c.452T>G	p.I151S	COSM14389	12	Substitution - Missense
151	c.452del	p.I151Tfs*8	COSM17927	3	Deletion - Frameshift
151	c.453C>G	p.I151M	COSM18355	2	Substitution - Missense
152	c.449_452dup	p.T152Yfs*23	COSM4189222	1	Insertion - Frameshift
152	c.451_452dup	p.T152Sfs*8	COSM8658957	1	Insertion - Frameshift
152	c.452_453insTC	p.T152Pfs*8	COSM1732001	1	Insertion - Frameshift
152	c.454_460del	p.T152Qfs*5	COSM1169464	1	Deletion - Frameshift
152	c.454del	p.T152Hfs*7	COSM34024	1	Deletion - Frameshift
153	c.455dup	p.L153Tfs*21	COSM98832	1	Insertion - Frameshift
153	c.456_457del	p.L153Afs*20	COSM1169472	2	Deletion - Frameshift
153	c.456_462del	p.L153Cfs*4	COSM6023784	1	Deletion - Frameshift
153	c.456del	p.L153Cfs*6	COSM14341	2	Deletion - Frameshift
153	c.457_463del	p.L153Cfs*4	COSM17771	1	Deletion - Frameshift
153	c.457del	p.L153Cfs*6	COSM1169468	1	Deletion - Frameshift
153	c.458T>C	p.L153P	COSM14363	13	Substitution - Missense
153	c.458T>G	p.L153R	COSM1732003	2	Substitution - Missense
153	c.?	p.L153Xfs*21	COSM1570319	1	Frameshift
154	c.458_459insTTGTTGACGGACAGCCTATTTTTGCCAATATCACACT	p.P154Cfs*2	COSM308530	1	Insertion - Frameshift
154	c.461C>T	p.P154L	COSM18266	8	Substitution - Missense
154	c.461del	p.P154Qfs*5	COSM34013	2	Deletion - Frameshift
155	c.462_463insCAA	p.P154_V155insQ	COSM7254424	1	Insertion - In frame
155	c.462del	p.V155Cfs*4	COSM423202	2	Deletion - Frameshift
155	c.463G>A	p.V155M	COSM18152	8	Substitution - Missense
155	c.463G>C	p.V155L	COSM17928	7	Substitution - Missense
155	c.463G>T	p.V155L	COSM14289	4	Substitution - Missense
155	c.464_465delinsAC	p.V155D	COSM18333	1	Substitution - Missense
155	c.464_465delinsGC	p.V155G	COSM18332	1	Substitution - Missense
155	c.464_474del	p.V155Efs*15	COSM17979	2	Deletion - Frameshift
155	c.464_478del	p.V155_K159del	COSM423204	1	Deletion - In frame
155	c.464del	p.V155Gfs*4	COSM17844	2	Deletion - Frameshift
155	c.?	p.V155Xfs*4	COSM1570317	1	Frameshift
156	c.465_466insA	p.Y156Ifs*18	COSM4770219	1	Insertion - Frameshift
156	c.466T>G	p.Y156D	COSM18328	1	Substitution - Missense
156	c.466_467ins?	p.?	COSM18078	1	Unknown
156	c.466_468del	p.Y156del	COSM10046313	4	Deletion - In frame
156	c.467del	p.Y156Lfs*3	COSM22469	4	Deletion - Frameshift
156	c.467dup	p.Y156*	COSM36325	1	Insertion - Frameshift
156	c.468T>A	p.Y156*	COSM479176	1	Substitution - Nonsense
156	c.468T>G	p.Y156*	COSM34021	4	Substitution - Nonsense
156	c.468_476del	p.Y156_K159delins*	COSM17981	1	Deletion - In frame
157	c.466_469dup	p.T157Ifs*18	COSM7719780	1	Insertion - Frameshift
157	c.468_469del	p.T157Sfs*16	COSM17848	2	Deletion - Frameshift
157	c.468_469dup	p.T157Ifs*3	COSM1651678	1	Insertion - Frameshift
157	c.468_471del	p.T157*	COSM17850	1	Deletion - Frameshift
157	c.469_470insTTA	p.Y156_T157insI	COSM7254112	1	Insertion - In frame
157	c.469_471del	p.T157del	COSM99115	1	Deletion - In frame
157	c.469_477del	p.T157_K159del	COSM34026	1	Deletion - In frame
157	c.469_477delinsT	p.T157*	COSM4770212	1	Complex - frameshift
157	c.469del	p.T157Lfs*2	COSM14391	3	Deletion - Frameshift
157	c.470C>T	p.T157I	COSM18025	4	Substitution - Missense
157	c.470_477del	p.T157Rfs*14	COSM423206	1	Deletion - Frameshift
157	c.470_483del	p.T157Mfs*12	COSM6503418	1	Deletion - Frameshift
157	c.?	p.T157fs*?	COSM5757611	1	Frameshift
158	c.470_471insA	p.L158Sfs*16	COSM30248	1	Insertion - Frameshift
158	c.471del	p.L158*	COSM1665853	1	Deletion - Frameshift
158	c.471dup	p.L158Sfs*16	COSM18123	2	Insertion - Frameshift
158	c.472C>G	p.L158V	COSM17657	24	Substitution - Missense
158	c.472_473del	p.L158Efs*15	COSM18031	4	Deletion - Frameshift
158	c.472_477del	p.L158_K159del	COSM18144	1	Deletion - In frame
158	c.472_490del	p.L158Rfs*6	COSM17992	1	Deletion - Frameshift
158	c.472del	p.L158*	COSM18121	2	Deletion - Frameshift
158	c.472dup	p.L158Pfs*16	COSM6961229	1	Insertion - Frameshift
158	c.473T>A	p.L158Q	COSM14368	11	Substitution - Missense
158	c.473T>C	p.L158P	COSM14387	10	Substitution - Missense
158	c.473T>G	p.L158R	COSM30286	5	Substitution - Missense
158	c.473_474del	p.L158Qfs*15	COSM1169463	1	Deletion - Frameshift
158	c.473_474delinsCC	p.L158P	COSM479177	1	Substitution - Missense
158	c.473del	p.L158Rfs*12	COSM1665854	1	Deletion - Frameshift
158	c.474G>C	p.L158=	COSM479178	1	Substitution - coding silent
158	c.?	p.L158R	COSM97125	2	Substitution - Missense
158	c.?	p.L158V	COSM1570304	1	Substitution - Missense
158	c.?	p.L158Xfs*169	COSM7455346	2	Frameshift
158	c.?	p.L158fs*?	COSM5757593	1	Frameshift
159	c.473dup	p.K159Efs*15	COSM18209	1	Insertion - Frameshift
159	c.475A>T	p.K159*	COSM422840	4	Substitution - Nonsense
159	c.475_479del	p.K159Afs*13	COSM7253927	1	Deletion - Frameshift
159	c.475_480delinsT	p.K159Sfs*13	COSM18287	1	Complex - frameshift
159	c.476_479del	p.K159Sfs*10	COSM253380	2	Deletion - Frameshift
159	c.476_491del	p.K159Rfs*6	COSM6960117	1	Deletion - Frameshift
159	c.477A>T	p.K159N	COSM97151	3	Substitution - Missense
160	c.477_479del	p.E160del	COSM14357	1	Deletion - In frame
160	c.477del	p.E160Sfs*10	COSM34030	5	Deletion - Frameshift
160	c.477dup	p.E160Rfs*14	COSM17908	2	Insertion - Frameshift
160	c.478G>A	p.E160K	COSM14309	5	Substitution - Missense
160	c.478G>T	p.E160*	COSM18075	5	Substitution - Nonsense
160	c.478delinsTC	p.E160Sfs*14	COSM36347	1	Complex - frameshift
160	c.478dup	p.E160Gfs*14	COSM9992739	1	Insertion - Frameshift
160	c.480G>T	p.E160D	COSM7253926	1	Substitution - Missense
160	c.480_483del	p.E160Dfs*9	COSM30250	2	Deletion - Frameshift
160	c.480del	p.E160Dfs*10	COSM17778	4	Deletion - Frameshift
161	c.479_480dup	p.R161Sfs*10	COSM99116	2	Insertion - Frameshift
161	c.480dup	p.R161Afs*13	COSM18400	1	Insertion - Frameshift
161	c.481C>G	p.R161G	COSM1684702	1	Substitution - Missense
161	c.481C>T	p.R161*	COSM17612	29	Substitution - Nonsense
161	c.481_483del	p.R161del	COSM17780	1	Deletion - In frame
161	c.481del	p.R161Dfs*9	COSM423207	1	Deletion - Frameshift
161	c.482G>A	p.R161Q	COSM18097	1	Substitution - Missense
161	c.482G>C	p.R161P	COSM17909	7	Substitution - Missense
161	c.482_483del	p.R161Lfs*12	COSM17779	1	Deletion - Frameshift
161	c.482del	p.R161Hfs*9	COSM9222188	1	Deletion - Frameshift
161	c.?	p.R161*	COSM1570314	1	Substitution - Nonsense
161	c.?	p.R161P	COSM1570306	2	Substitution - Missense
162	c.481_482dup	p.C162Dfs*9	COSM17910	1	Insertion - Frameshift
162	c.482dup	p.C162Mfs*12	COSM18329	2	Insertion - Frameshift
162	c.483_491del	p.C162_Q164del	COSM1169450	1	Deletion - In frame
162	c.483dup	p.C162Mfs*12	COSM144719	1	Insertion - Frameshift
162	c.484T>C	p.C162R	COSM18073	19	Substitution - Missense
162	c.485G>A	p.C162Y	COSM14408	9	Substitution - Missense
162	c.485G>T	p.C162F	COSM25676	4	Substitution - Missense
162	c.485del	p.C162Sfs*8	COSM6503419	1	Deletion - Frameshift
162	c.486C>A	p.C162*	COSM18258	4	Substitution - Nonsense
162	c.486C>G	p.C162W	COSM18023	3	Substitution - Missense
162	c.?	p.C162W	COSM5757602	1	Substitution - Missense
163	c.486_487del	p.L163Pfs*10	COSM6023871	1	Deletion - Frameshift
163	c.487del	p.L163Sfs*7	COSM17783	1	Deletion - Frameshift
163	c.488T>A	p.L163H	COSM36342	2	Substitution - Missense
163	c.488T>C	p.L163P	COSM14355	6	Substitution - Missense
163	c.488_489delinsCT	p.L163P	COSM14381	1	Substitution - Missense
163	c.488del	p.L163Pfs*7	COSM14419	2	Deletion - Frameshift
163	c.?	p.L163P	COSM5757589	1	Substitution - Missense
164	c.490C>T	p.Q164*	COSM14397	8	Substitution - Nonsense
164	c.490dup	p.Q164Pfs*10	COSM25689	1	Insertion - Frameshift
164	c.491A>C	p.Q164P	COSM18212	4	Substitution - Missense
164	c.491A>T	p.Q164L	COSM30288	1	Substitution - Missense
164	c.491_492del	p.Q164Rfs*9	COSM17911	2	Deletion - Frameshift
164	c.491_494del	p.Q164Lfs*5	COSM99117	1	Deletion - Frameshift
164	c.492G>T	p.Q164H	COSM17662	1	Substitution - Missense
164	c.492_493del	p.Q164Hfs*9	COSM1169456	1	Deletion - Frameshift
165	c.493G>A	p.V165I	COSM18263	1	Substitution - Missense
165	c.493G>C	p.V165L	COSM7253331	1	Substitution - Missense
165	c.493_503del	p.V165Pfs*5	COSM6506465	1	Deletion - Frameshift
165	c.493del	p.V165Lfs*5	COSM14332	2	Deletion - Frameshift
165	c.494T>A	p.V165D	COSM17785	5	Substitution - Missense
166	c.494_495dup	p.V166Lfs*5	COSM17852	2	Insertion - Frameshift
166	c.495_497dup	p.V166dup	COSM18341	1	Insertion - In frame
166	c.495del	p.V166Sfs*4	COSM1732004	2	Deletion - Frameshift
166	c.495dup	p.V166Cfs*8	COSM34002	3	Insertion - Frameshift
166	c.496G>A	p.V166I	COSM14307	1	Substitution - Missense
166	c.496G>T	p.V166F	COSM17982	2	Substitution - Missense
166	c.496_497del	p.V166Pfs*7	COSM3734697	1	Deletion - Frameshift
166	c.497T>A	p.V166D	COSM17913	7	Substitution - Missense
166	c.497T>G	p.V166G	COSM17786	4	Substitution - Missense
166	c.497_501del	p.V166Efs*6	COSM18401	1	Deletion - Frameshift
167	c.473_498dup	p.R167*	COSM36345	1	Insertion - Frameshift
167	c.498_506del	p.R167_L169del	COSM6506466	1	Deletion - In frame
167	c.499C>G	p.R167G	COSM25673	2	Substitution - Missense
167	c.499C>T	p.R167W	COSM14311	6	Substitution - Missense
167	c.499_500del	p.R167Efs*6	COSM1732005	1	Deletion - Frameshift
167	c.499_510del	p.R167_V170del	COSM99122	1	Deletion - In frame
167	c.499del	p.R167Gfs*3	COSM17676	2	Deletion - Frameshift
167	c.500G>A	p.R167Q	COSM17983	6	Substitution - Missense
167	c.500G>T	p.R167L	COSM4189068	3	Substitution - Missense
167	c.500_501del	p.R167Qfs*6	COSM30251	1	Deletion - Frameshift
167	c.?	p.R167_V170del	COSM1570343	1	Deletion - In frame
168	c.501del	p.S168Afs*2	COSM17770	7	Deletion - Frameshift
168	c.502A>T	p.S168C	COSM3364923	1	Substitution - Missense
168	c.503_504del	p.S168Tfs*5	COSM1732006	1	Deletion - Frameshift
168	c.503_509del	p.S168Tfs*32	COSM4770210	1	Deletion - Frameshift
168	c.503del	p.S168Tfs*2	COSM18262	2	Deletion - Frameshift
168	c.504_511del	p.S168Rfs*3	COSM14401	1	Deletion - Frameshift
169	c.505C>T	p.L169=	COSM18379	2	Substitution - coding silent
169	c.505_510del	p.L169_V170del	COSM18155	2	Deletion - In frame
169	c.505del	p.L169*	COSM17914	3	Deletion - Frameshift
169	c.506T>C	p.L169P	COSM17837	19	Substitution - Missense
169	c.506_510del	p.L169Qfs*3	COSM1732007	3	Deletion - Frameshift
169	c.506_511del	p.L169_K171delinsQ	COSM6506753	2	Deletion - In frame
169	c.506_516del	p.L169Rfs*83	COSM9645694	1	Deletion - Frameshift
169	c.506del	p.L169Qfs*33	COSM34003	10	Deletion - Frameshift
169	c.?	p.L169P	COSM5757603	1	Substitution - Missense
170	c.507_508del	p.V170Qfs*3	COSM99118	1	Deletion - Frameshift
170	c.507_516del	p.V170Rfs*29	COSM14378	2	Deletion - Frameshift
170	c.509T>A	p.V170D	COSM18264	3	Substitution - Missense
170	c.509T>C	p.V170A	COSM253382	1	Substitution - Missense
170	c.509_512del	p.V170Gfs*31	COSM6506467	1	Deletion - Frameshift
170	c.509_527del	p.V170Gfs*26	COSM9645696	1	Deletion - Frameshift
170	c.509del	p.V170Afs*32	COSM17677	3	Deletion - Frameshift
170	c.?	p.V170D	COSM1570303	1	Substitution - Missense
171	c.509_510dup	p.K171Sfs*32	COSM14280	1	Insertion - Frameshift
171	c.509_510insA	p.K171Qfs*3	COSM18399	2	Insertion - Frameshift
171	c.510_529del	p.K171Tfs*78	COSM9645691	1	Deletion - Frameshift
171	c.511A>T	p.K171*	COSM3734681	1	Substitution - Nonsense
171	c.512_516del	p.K171Rfs*83	COSM18145	1	Deletion - Frameshift
171	c.512del	p.K171Sfs*31	COSM1665855	1	Deletion - Frameshift
171	c.513G>C	p.K171N	COSM14374	3	Substitution - Missense
171	c.513del	p.K171Nfs*31	COSM3734714	3	Deletion - Frameshift
172	c.512dup	p.P172Afs*2	COSM6950530	1	Insertion - Frameshift
172	c.514_517del	p.P172Rfs*29	COSM3734711	1	Deletion - Frameshift
172	c.514_519del	p.P172_E173del	COSM253383	1	Deletion - In frame
172	c.514_527del	p.P172Efs*79	COSM26794	2	Deletion - Frameshift
172	c.515_516del	p.P172Rfs*83	COSM7253775	1	Deletion - Frameshift
172	c.515del	p.P172Lfs*30	COSM14327	6	Deletion - Frameshift
173	c.515_516insA	p.E173*	COSM4410936	8	Insertion - Frameshift
173	c.516_517insCTT	p.P172_E173insL	COSM7253237	1	Insertion - In frame
173	c.516_525del	p.E173Gfs*26	COSM17915	1	Deletion - Frameshift
173	c.516del	p.E173Rfs*29	COSM4770208	1	Deletion - Frameshift
173	c.517G>T	p.E173*	COSM97152	5	Substitution - Nonsense
173	c.517_522del	p.E173_N174del	COSM253384	2	Deletion - In frame
173	c.517dup	p.E173Gfs*83	COSM30341	1	Insertion - Frameshift
173	c.518del	p.E173Gfs*29	COSM9645698	1	Deletion - Frameshift
174	c.519_520del	p.N174Lfs*81	COSM253385	1	Deletion - Frameshift
174	c.520A>G	p.N174D	COSM14366	1	Substitution - Missense
174	c.521del	p.N174Ifs*28	COSM17858	3	Deletion - Frameshift
174	c.521dup	p.N174Kfs*82	COSM17916	5	Insertion - Frameshift
174	c.522_523del	p.N174Kfs*81	COSM99119	1	Deletion - Frameshift
175	c.521_522dup	p.Y175Ifs*28	COSM3734683	1	Insertion - Frameshift
175	c.522_523dup	p.Y175Ffs*28	COSM17931	1	Insertion - Frameshift
175	c.522_523insATTT	p.Y175Ifs*82	COSM7254122	2	Insertion - Frameshift
175	c.522_539del	p.Y175_I180del	COSM6942729	1	Deletion - In frame
175	c.523T>G	p.Y175D	COSM17917	2	Substitution - Missense
175	c.523_524del	p.Y175Qfs*80	COSM9645699	1	Deletion - Frameshift
175	c.523del	p.Y175Tfs*27	COSM14388	8	Deletion - Frameshift
175	c.523dup	p.Y175Lfs*81	COSM14291	5	Insertion - Frameshift
175	c.524del	p.Y175Sfs*27	COSM14377	4	Deletion - Frameshift
175	c.524dup	p.Y175*	COSM6503417	2	Insertion - Frameshift
175	c.525C>A	p.Y175*	COSM17789	12	Substitution - Nonsense
175	c.525C>G	p.Y175*	COSM1169455	3	Substitution - Nonsense
175	c.525_529del	p.Y175*	COSM18119	1	Insertion - Frameshift
175	c.525_533del	p.Y175_L178delins*	COSM307756	1	Deletion - In frame
176	c.525_532del	p.R176Gfs*77	COSM17788	1	Deletion - Frameshift
176	c.526A>T	p.R176W	COSM18072	1	Substitution - Missense
176	c.526_533del	p.R176Gfs*77	COSM9992039	1	Deletion - Frameshift
177	c.528del	p.R177Dfs*25	COSM18063	5	Deletion - Frameshift
177	c.528dup	p.R177Efs*79	COSM423297	1	Insertion - Frameshift
177	c.529A>T	p.R177*	COSM17866	8	Substitution - Nonsense
177	c.529del	p.R177Dfs*25	COSM17790	2	Deletion - Frameshift
177	c.530_531del	p.R177Tfs*78	COSM423209	4	Deletion - Frameshift
177	c.530_535delinsC	p.R177Tfs*77	COSM34015	2	Complex - frameshift
177	c.531del	p.R177Sfs*25	COSM99120	2	Deletion - Frameshift
178	c.532C>A	p.L178M	COSM7254376	1	Substitution - Missense
178	c.532del	p.L178Wfs*24	COSM18265	2	Deletion - Frameshift
178	c.532dup	p.L178Pfs*78	COSM1169659	1	Insertion - Frameshift
178	c.533T>C	p.L178P	COSM1651695	6	Substitution - Missense
178	c.533T>G	p.L178R	COSM18010	3	Substitution - Missense
178	c.533_534del	p.L178Rfs*77	COSM17919	2	Deletion - Frameshift
178	c.533_544del	p.L178_V181del	COSM53188	1	Deletion - In frame
178	c.533del	p.L178Rfs*24	COSM7254113	1	Deletion - Frameshift
178	c.?	p.L178fs*?	COSM5757604	1	Frameshift
179	c.533dup	p.D179Gfs*77	COSM17918	1	Insertion - Frameshift
179	c.535del	p.D179Tfs*23	COSM17840	3	Deletion - Frameshift
179	c.535dup	p.D179Gfs*77	COSM30337	2	Insertion - Frameshift
179	c.536_541del	p.D179_I180del	COSM253387	1	Deletion - In frame
179	c.536_544del	p.D179_R182delinsG	COSM9223111	1	Deletion - In frame
179	c.536del	p.D179Afs*23	COSM18403	1	Deletion - Frameshift
179	c.?	p.D179fs*?	COSM5757598	1	Frameshift
180	c.537_538del	p.I180Rfs*75	COSM1732010	1	Deletion - Frameshift
180	c.538A>G	p.I180V	COSM97153	1	Substitution - Missense
180	c.538_547del	p.I180Rfs*19	COSM10046308	4	Deletion - Frameshift
180	c.539T>A	p.I180N	COSM18000	6	Substitution - Missense
180	c.539_540insG	p.I180Mfs*76	COSM1169657	1	Insertion - Frameshift
180	c.540_564del	p.I180Mfs*14	COSM99123	1	Deletion - Frameshift
180	c.540del	p.I180Mfs*22	COSM14421	3	Deletion - Frameshift
180	c.?	p.I180V	COSM1570301	1	Substitution - Missense
181	c.540_544delinsT	p.V181Gfs*20	COSM18261	1	Complex - frameshift
181	c.541G>A	p.V181I	COSM6834749	1	Substitution - Missense
181	c.541_547del	p.V181Rfs*19	COSM249375	1	Deletion - Frameshift
181	c.541del	p.V181Sfs*21	COSM249330	2	Deletion - Frameshift
181	c.542_545del	p.V181Gfs*20	COSM36340	2	Deletion - Frameshift
181	c.542_549del	p.V181Afs*72	COSM6980174	1	Deletion - Frameshift
181	c.?	p.V181Xfs*14	COSM1570325	1	Frameshift
182	c.543_544insT	p.R182*	COSM30335	1	Insertion - Frameshift
182	c.544_545del	p.R182Vfs*73	COSM30252	2	Deletion - Frameshift
182	c.544del	p.R182Gfs*20	COSM6023878	1	Deletion - Frameshift
182	c.546G>A	p.R182=	COSM18364	1	Substitution - coding silent
182	c.546del	p.R182Sfs*20	COSM249414	5	Deletion - Frameshift
183	c.546dup	p.S183Vfs*73	COSM6506468	1	Insertion - Frameshift
183	c.547del	p.S183Rfs*19	COSM17792	2	Deletion - Frameshift
183	c.547dup	p.S183Ffs*73	COSM1169476	2	Insertion - Frameshift
183	c.548C>A	p.S183*	COSM14380	6	Substitution - Nonsense
183	c.548C>T	p.S183L	COSM6506469	1	Substitution - Missense
183	c.548_555del	p.S183*	COSM18019	1	Insertion - Frameshift
184	c.550_556del	p.L184Kfs*16	COSM6023873	1	Deletion - Frameshift
184	c.550_559del	p.L184Ifs*15	COSM3734707	1	Deletion - Frameshift
184	c.550del	p.L184Sfs*18	COSM7253307	1	Deletion - Frameshift
184	c.551T>C	p.L184P	COSM17854	11	Substitution - Missense
184	c.551T>G	p.L184R	COSM249315	4	Substitution - Missense
185	c.552_553del	p.Y185Rfs*70	COSM30336	2	Deletion - Frameshift
185	c.552del	p.Y185Tfs*17	COSM9645693	1	Deletion - Frameshift
185	c.553_554insG	p.Y185*	COSM18330	1	Insertion - Frameshift
185	c.553del	p.Y185Tfs*17	COSM17684	1	Deletion - Frameshift
185	c.554_563del	p.Y185Wfs*14	COSM249390	1	Deletion - Frameshift
185	c.554_572del	p.Y185Sfs*11	COSM30328	1	Deletion - Frameshift
185	c.554del	p.Y185Sfs*17	COSM14303	3	Deletion - Frameshift
185	c.555C>A	p.Y185*	COSM422841	4	Substitution - Nonsense
185	c.555C>G	p.Y185*	COSM18356	2	Substitution - Nonsense
185	c.555C>T	p.Y185=	COSM18373	1	Substitution - coding silent
185	c.555_557del	p.Y185_E186delins*	COSM9518305	1	Deletion - In frame
185	c.555_559delinsAT	p.Y185_D187delins*	COSM674223	1	Substitution - Nonsense
185	c.555del	p.Y185*	COSM423211	1	Insertion - Frameshift
185	c.?	p.Y185*	COSM5757596	1	Substitution - Nonsense
186	c.556G>T	p.E186*	COSM25670	4	Substitution - Nonsense
186	c.556_562del	p.E186Wfs*14	COSM17984	1	Deletion - Frameshift
186	c.556del	p.E186Kfs*16	COSM9645692	1	Deletion - Frameshift
186	c.556dup	p.E186Gfs*70	COSM6929924	2	Insertion - Frameshift
186	c.557_561del	p.E186Afs*68	COSM17985	2	Deletion - Frameshift
187	c.557_558insGAAA	p.D187Kfs*70	COSM7253770	1	Insertion - Frameshift
187	c.558_559insC	p.D187Rfs*69	COSM17674	1	Insertion - Frameshift
187	c.558del	p.D187Ifs*15	COSM36336	1	Deletion - Frameshift
187	c.559G>A	p.D187N	COSM1757302	1	Substitution - Missense
187	c.559G>T	p.D187Y	COSM9521803	1	Substitution - Missense
187	c.559_560del	p.D187Sfs*68	COSM17793	3	Deletion - Frameshift
187	c.559_566del	p.D187Rfs*66	COSM6946520	1	Deletion - Frameshift
187	c.559del	p.D187Ifs*15	COSM1169477	1	Deletion - Frameshift
187	c.560A>T	p.D187V	COSM18020	1	Substitution - Missense
187	c.560_580del	p.D187_N193del	COSM17986	1	Deletion - In frame
187	c.561_563del	p.D187_L188delinsE	COSM17795	2	Deletion - In frame
187	c.561_564del	p.D187Efs*14	COSM17799	1	Deletion - Frameshift
188	c.561_569del	p.L188_D190del	COSM4770217	1	Deletion - In frame
188	c.561del	p.L188Wfs*14	COSM249544	1	Deletion - Frameshift
188	c.562C>G	p.L188V	COSM18026	1	Substitution - Missense
188	c.562del	p.L188Wfs*14	COSM14337	2	Deletion - Frameshift
188	c.563T>A	p.L188Q	COSM17800	2	Substitution - Missense
188	c.563T>C	p.L188P	COSM25678	5	Substitution - Missense
188	c.563T>G	p.L188R	COSM25680	3	Substitution - Missense
188	c.563_564insCTT	p.L188dup	COSM7253285	1	Insertion - In frame
188	c.563del	p.L188Rfs*14	COSM17794	2	Deletion - Frameshift
188	c.564G>T	p.L188=	COSM479179	1	Substitution - coding silent
188	c.?	p.L188P	COSM5757594	1	Substitution - Missense
189	c.563dup	p.E189Gfs*67	COSM36339	1	Insertion - Frameshift
189	c.564_565delinsTT	p.E189*	COSM479180	1	Substitution - Nonsense
189	c.564_565dup	p.E189Gfs*14	COSM1169658	1	Insertion - Frameshift
189	c.565G>A	p.E189K	COSM17920	3	Substitution - Missense
189	c.565G>C	p.E189Q	COSM3364924	1	Substitution - Missense
189	c.565G>T	p.E189*	COSM97154	6	Substitution - Nonsense
189	c.565_568del	p.E189Tfs*12	COSM25695	1	Deletion - Frameshift
189	c.565del	p.E189Kfs*13	COSM17847	2	Deletion - Frameshift
189	c.566_569del	p.E189Afs*12	COSM17801	1	Deletion - Frameshift
189	c.566_582del	p.E189Afs*61	COSM6981559	1	Deletion - Frameshift
190	c.567del	p.D190Tfs*12	COSM17802	1	Deletion - Frameshift
190	c.568del	p.D190Tfs*12	COSM18340	1	Deletion - Frameshift
190	c.568dup	p.D190Gfs*66	COSM30334	1	Insertion - Frameshift
191	c.571_575del	p.H191Kfs*63	COSM18159	1	Deletion - Frameshift
191	c.572del	p.H191Pfs*11	COSM255076	2	Deletion - Frameshift
191	c.573_576del	p.H191Qfs*10	COSM18018	1	Deletion - Frameshift
191	c.573_577del	p.H191Qfs*63	COSM17803	1	Deletion - Frameshift
192	c.574C>T	p.P192S	COSM18386	2	Substitution - Missense
192	c.574_595del	p.P192Sfs*3	COSM49061	1	Deletion - Frameshift
192	c.575C>T	p.P192L	COSM14353	1	Substitution - Missense
192	c.575del	p.P192Qfs*10	COSM19403	1	Deletion - Frameshift
193	c.577_578del	p.N193Cfs*62	COSM6952007	1	Deletion - Frameshift
193	c.578del	p.N193Mfs*9	COSM18404	2	Deletion - Frameshift
193	c.578dup	p.N193Kfs*63	COSM17921	7	Insertion - Frameshift
194	c.580_583delinsAA	p.V194Kfs*61	COSM6506470	1	Complex - frameshift
194	c.581_582del	p.V194Afs*61	COSM18357	3	Deletion - Frameshift
194	c.582G>T	p.V194=	COSM18030	1	Substitution - coding silent
195	c.582_583insT	p.Q195Sfs*61	COSM17987	1	Insertion - Frameshift
195	c.583C>T	p.Q195*	COSM14359	7	Substitution - Nonsense
195	c.584A>G	p.Q195R	COSM18375	1	Substitution - Missense
195	c.584_593del	p.Q195Rfs*4	COSM7253225	1	Deletion - Frameshift
196	c.585_586del	p.K196Rfs*59	COSM255077	1	Deletion - Frameshift
196	c.586A>T	p.K196*	COSM30293	6	Substitution - Nonsense
196	c.587_588del	p.K196Rfs*59	COSM25696	2	Deletion - Frameshift
196	c.587_593del	p.K196Rfs*4	COSM17922	1	Deletion - Frameshift
196	c.587_594del	p.K196Rfs*57	COSM18376	1	Deletion - Frameshift
196	c.587_596del	p.K196Sfs*3	COSM4770215	1	Deletion - Frameshift
197	c.588del	p.D197Tfs*5	COSM30253	1	Deletion - Frameshift
197	c.589_590del	p.D197Pfs*58	COSM17923	1	Deletion - Frameshift
197	c.590del	p.D197Afs*5	COSM255078	1	Deletion - Frameshift
198	c.592C>T	p.L198=	COSM18089	1	Substitution - coding silent
198	c.592_607del	p.L198Rfs*16	COSM14418	1	Deletion - Frameshift
198	c.592del	p.L198Wfs*4	COSM1732011	1	Deletion - Frameshift
198	c.593del	p.L198Rfs*4	COSM7253539	1	Deletion - Frameshift
198	c.594G>A	p.L198=	COSM14343	1	Substitution - coding silent
199	c.597_604del	p.E199Dfs*54	COSM255079	1	Deletion - Frameshift
199	c.597_616del	p.E199Dfs*50	COSM7253922	1	Deletion - Frameshift
200	c.596dup	p.R200Afs*56	COSM423298	1	Insertion - Frameshift
200	c.598C>T	p.R200W	COSM18024	3	Substitution - Missense
202	c.602dup	p.T202Dfs*54	COSM18384	1	Insertion - Frameshift
202	c.604_608del	p.T202Gfs*52	COSM17924	1	Deletion - Frameshift
203	c.607_608del	p.Q203Gfs*52	COSM30325	4	Deletion - Frameshift
203	c.607del	p.Q203Rfs*16	COSM14396	1	Deletion - Frameshift
203	c.609_616del	p.Q203Hfs*50	COSM6023874	1	Deletion - Frameshift
204	c.610G>A	p.E204K	COSM18370	1	Substitution - Missense
204	c.611A>G	p.E204G	COSM14344	1	Substitution - Missense
205	c.611dup	p.R205Afs*51	COSM99130	1	Insertion - Frameshift
205	c.614_615del	p.R205Hfs*50	COSM249403	2	Deletion - Frameshift
206	c.615delinsAA	p.I206Nfs*50	COSM18138	1	Complex - frameshift
206	c.616delinsGG	p.I206Gfs*50	COSM674224	1	Complex - frameshift
206	c.616dup	p.I206Nfs*50	COSM18331	1	Insertion - Frameshift
207	c.618_621del	p.A207Ifs*11	COSM17925	1	Deletion - Frameshift
207	c.618dup	p.A207Cfs*49	COSM30333	6	Insertion - Frameshift
207	c.619_623del	p.A207Sfs*47	COSM4188796	1	Deletion - Frameshift
207	c.620C>T	p.A207V	COSM14336	1	Substitution - Missense
207	c.?	p.A207Xfs*49	COSM1570296	1	Frameshift
208	c.622C>A	p.H208N	COSM5065143	2	Substitution - Missense
208	c.623dup	p.H208Qfs*48	COSM3734710	1	Insertion - Frameshift
209	c.625C>T	p.Q209*	COSM18382	2	Substitution - Nonsense
209	c.625_632del	p.Q209Gfs*44	COSM423215	1	Deletion - Frameshift
209	c.625dup	p.Q209Pfs*47	COSM9645700	1	Insertion - Frameshift
210	c.627dup	p.R210Tfs*46	COSM26793	3	Insertion - Frameshift
210	c.628_632del	p.R210Gfs*44	COSM249482	1	Deletion - Frameshift
210	c.629_630del	p.R210Hfs*45	COSM14278	1	Deletion - Frameshift
211	c.630dup	p.M211Dfs*45	COSM6945212	2	Insertion - Frameshift
211	c.633G>A	p.M211I	COSM14358	1	Substitution - Missense
212	c.634_635del	p.G212Rfs*43	COSM255080	1	Deletion - Frameshift
213	c.620_635dup	p.D213Tfs*48	COSM36354	1	Insertion - Frameshift
213	c.637dup	p.D213Gfs*43	COSM30254	1	Insertion - Frameshift
213	c.638dup	p.D213Efs*43	COSM249353	1	Insertion - Frameshift
214	c.640dup	p.*214Lfs*42	COSM6928122	1	Insertion - Frameshift
214	c.641G>T	p.*214Lext*14	COSM479181	1	Nonstop extension
214	c.641_642del	p.*214=	COSM85752	1	Insertion - Frameshift
214	c.642A>C	p.*214Cext*14	COSM17663	1	Nonstop extension
214	c.642A>G	p.*214Wext*14	COSM1566370	1	Nonstop extension
	c.-102_-101insG	p.?	COSM18338	1	Unknown
	c.-10C>T	p.?	COSM18001	1	Unknown
	c.-11T>C	p.?	COSM18007	1	Unknown
	c.-14G>A	p.?	COSM18394	1	Unknown
	c.-1_20del	p.?	COSM17729	1	Unknown
	c.-22G>A	p.?	COSM18002	1	Unknown
	c.-26C>T	p.?	COSM3727794	1	Unknown
	c.-28G>A	p.?	COSM1684703	1	Unknown
	c.-29C>T	p.?	COSM18003	1	Unknown
	c.-30C>T	p.?	COSM3727793	1	Unknown
	c.-37G>A	p.?	COSM18392	1	Unknown
	c.-38C>T	p.?	COSM18334	1	Unknown
	c.-3G>A	p.?	COSM3727792	1	Unknown
	c.-51G>A	p.?	COSM3727788	1	Unknown
	c.-60C>T	p.?	COSM18393	1	Unknown
	c.-64C>T	p.?	COSN2535324	1	Unknown
	c.-71dup	p.?	COSM18336	1	Unknown
	c.-82G>A	p.?	COSM18006	1	Unknown
	c.-87G>A	p.?	COSM18395	1	Unknown
	c.100_101ins?	p.?	COSM18197	1	Unknown
	c.105_106ins?	p.?	COSM18327	1	Unknown
	c.157_158ins?	p.?	COSM17700	1	Unknown
	c.182_183ins?	p.?	COSM17703	1	Unknown
	c.184_185ins?	p.?	COSM17704	1	Unknown
	c.252_253ins?	p.?	COSM17722	1	Unknown
	c.275_276ins?	p.?	COSM17954	1	Unknown
	c.281_282ins?	p.?	COSM17727	1	Unknown
	c.297_298ins?	p.?	COSM18076	1	Unknown
	c.328_329ins?	p.?	COSM17959	1	Unknown
	c.332_340+1del	p.?	COSM18288	1	Unknown
	c.335_340+1del	p.?	COSM6506471	1	Unknown
	c.336_340+18del	p.?	COSM4411127	5	Unknown
	c.340+1808C>T	p.?	COSN2535325	1	Unknown
	c.340+1G>A	p.?	COSM18005	15	Unknown
	c.340+1G>C	p.?	COSM479170	2	Unknown
	c.340+1G>T	p.?	COSM18289	4	Unknown
	c.340+1del	p.?	COSM17960	6	Unknown
	c.340+2T>A	p.?	COSM249128	5	Unknown
	c.340+2T>C	p.?	COSM18021	2	Unknown
	c.340+2T>G	p.?	COSM17748	2	Unknown
	c.340+2_340+4del	p.?	COSM26795	2	Unknown
	c.340+2del	p.?	COSM36361	2	Unknown
	c.340+8C>T	p.?	COSM18055	1	Unknown
	c.340+9C>T	p.?	COSM17749	1	Unknown
	c.341-1009A>G	p.?	COSN2535330	1	Unknown
	c.341-1040G>T	p.?	COSN2535329	1	Unknown
	c.341-1117T>C	p.?	COSN2535328	1	Unknown
	c.341-1165T>C	p.?	COSN2535327	1	Unknown
	c.341-1185T>C	p.?	COSN2535326	1	Unknown
	c.341-11T>A	p.?	COSM36358	1	Unknown
	c.341-1661G>A	p.?	COSN2517151	1	Unknown
	c.341-1G>A	p.?	COSM18290	4	Unknown
	c.341-1G>C	p.?	COSM422838	2	Unknown
	c.341-1G>T	p.?	COSM17988	8	Unknown
	c.341-1_342del	p.?	COSM6506505	1	Unknown
	c.341-21A>G	p.?	COSN2535332	1	Unknown
	c.341-2A>C	p.?	COSM6944111	6	Unknown
	c.341-2A>G	p.?	COSM30295	11	Unknown
	c.341-2A>T	p.?	COSM14425	8	Unknown
	c.341-2_346del	p.?	COSM30243	1	Unknown
	c.341-2_348del	p.?	COSM7254415	2	Unknown
	c.341-2_349del	p.?	COSM25703	1	Unknown
	c.341-2_360del	p.?	COSM6963704	1	Unknown
	c.341-2del	p.?	COSM17750	3	Unknown
	c.341-326_341-324del	p.?	COSN2535313	1	Unknown
	c.341-3T>A	p.?	COSM4770211	1	Unknown
	c.341-3_341-2del	p.?	COSM14423	1	Unknown
	c.341-5_343delinsT	p.?	COSM6929502	1	Unknown
	c.341-869G>T	p.?	COSN2535331	1	Unknown
	c.341-8_341-2del	p.?	COSM3358441	1	Unknown
	c.391_392ins?	p.?	COSM14331	1	Unknown
	c.405_406ins?	p.?	COSM17761	1	Unknown
	c.407_408ins?	p.?	COSM14424	1	Unknown
	c.438_439ins?	p.?	COSM14352	1	Unknown
	c.446_463del18	p.?	COSM18418	1	Unknown
	c.457_458ins?	p.?	COSM17772	1	Unknown
	c.457_463+4del	p.?	COSM9645690	1	Unknown
	c.458_463+2del	p.?	COSM18008	1	Unknown
	c.461_462ins?	p.?	COSM17773	1	Unknown
	c.463+174del	p.?	COSN2535314	6	Unknown
	c.463+1G>A	p.?	COSM51391	7	Unknown
	c.463+1G>C	p.?	COSM26152	2	Unknown
	c.463+1G>T	p.?	COSM17989	14	Unknown
	c.463+1del	p.?	COSM17907	4	Unknown
	c.463+229G>A	p.?	COSN2535333	1	Unknown
	c.463+23A>G	p.?	COSM17776	1	Unknown
	c.463+2T>A	p.?	COSM17990	4	Unknown
	c.463+2T>C	p.?	COSM18132	11	Unknown
	c.463+2T>G	p.?	COSM422839	1	Unknown
	c.463+3A>T	p.?	COSM17774	2	Unknown
	c.463+436C>T	p.?	COSN2535334	1	Unknown
	c.463+559A>C	p.?	COSN2535335	1	Unknown
	c.463+5T>A	p.?	COSM17728	1	Unknown
	c.463+732T>A	p.?	COSN2535336	1	Unknown
	c.463+8C>T	p.?	COSM17775	1	Unknown
	c.463_463+8delinsA	p.?	COSM14426	2	Unknown
	c.464-1212A>G	p.?	COSN2535337	1	Unknown
	c.464-17_464-3del	p.?	COSM18141	1	Unknown
	c.464-1G>A	p.?	COSM14376	10	Unknown
	c.464-1G>C	p.?	COSM14437	8	Unknown
	c.464-1G>T	p.?	COSM14438	7	Unknown
	c.464-1_469del	p.?	COSM255082	1	Unknown
	c.464-1_471del	p.?	COSM30326	1	Unknown
	c.464-1del	p.?	COSM5020990	5	Unknown
	c.464-2A>C	p.?	COSM17869	1	Unknown
	c.464-2A>G	p.?	COSM18054	5	Unknown
	c.464-2A>T	p.?	COSM98444	1	Unknown
	c.464-2_465del	p.?	COSM255083	1	Unknown
	c.464-2_469del	p.?	COSM17777	1	Unknown
	c.464-2del	p.?	COSM6942733	1	Unknown
	c.464-3C>G	p.?	COSM25672	1	Unknown
	c.464-3C>T	p.?	COSM14371	1	Unknown
	c.464-431A>C	p.?	COSN2535339	1	Unknown
	c.464-4_472del	p.?	COSM9994083	1	Unknown
	c.464-6_480del	p.?	COSM7254165	1	Unknown
	c.464-834G>A	p.?	COSN2535338	1	Unknown
	c.464-9_466del	p.?	COSM9645702	1	Unknown
	c.481_482ins?	p.?	COSM17781	1	Unknown
	c.528_529ins?	p.?	COSM17791	1	Unknown
	c.532_533ins?	p.?	COSM18402	1	Unknown
	c.638_*1delinsG	p.?	COSM255081	1	Unknown
	c.638_*6del	p.?	COSM6506633	1	Unknown
	c.*1835C>T	p.?	COSN2535395	1	Unknown
	c.*1972T>C	p.?	COSN2535396	1	Unknown
	c.*1976A>G	p.?	COSN2535397	1	Unknown
	c.*1989G>A	p.?	COSN2535398	1	Unknown
	c.*2001T>C	p.?	COSN2535399	1	Unknown
	c.*2003A>G	p.?	COSN2535400	1	Unknown
	c.*2008A>G	p.?	COSN2535401	1	Unknown
	c.*2026T>C	p.?	COSN2535402	1	Unknown
	c.*2039T>C	p.?	COSN2535403	1	Unknown
	c.*2041A>G	p.?	COSN2535404	1	Unknown
	c.*2130T>C	p.?	COSN2535405	2	Unknown
	c.*2141G>A	p.?	COSN2535407	1	Unknown
	c.*24G>A	p.?	COSM18396	1	Unknown
	c.*802A>G	p.?	COSN2535340	1	Unknown
	c.*803A>C	p.?	COSN2535341	1	Unknown
	c.*807T>C	p.?	COSN2535342	1	Unknown
	c.*811T>C	p.?	COSN2535343	3	Unknown
	c.*813T>C	p.?	COSN2535346	1	Unknown
	c.*816G>T	p.?	COSN2535347	1	Unknown
	c.*819T>C	p.?	COSN2535348	1	Unknown
	c.*821T>C	p.?	COSN2535349	1	Unknown
	c.*824T>C	p.?	COSN2535350	2	Unknown
	c.*829A>G	p.?	COSN2535352	1	Unknown
	c.*831G>A	p.?	COSN2535353	1	Unknown
	c.*836A>G	p.?	COSN2535354	1	Unknown
	c.*837A>G	p.?	COSN2535355	1	Unknown
	c.*838T>C	p.?	COSN2535356	1	Unknown
	c.*840A>G	p.?	COSN2535357	1	Unknown
	c.*852A>G	p.?	COSN2535358	1	Unknown
	c.*857A>G	p.?	COSN2535359	2	Unknown
	c.*862T>C	p.?	COSN2535361	1	Unknown
	c.*867T>C	p.?	COSN2535362	1	Unknown
	c.*868T>C	p.?	COSN2535363	1	Unknown
	c.*871T>C	p.?	COSN2535364	1	Unknown
	c.*877T>C	p.?	COSN2535365	1	Unknown
	c.*878A>G	p.?	COSN2535366	1	Unknown
	c.*880del	p.?	COSN2535320	1	Unknown
	c.*925T>C	p.?	COSN2535367	1	Unknown
	c.*931T>C	p.?	COSN2535368	1	Unknown
	c.*934T>C	p.?	COSN2535369	1	Unknown
	c.*939T>C	p.?	COSN2535370	1	Unknown
	c.*945del	p.?	COSN2535321	2	Unknown
	c.*947A>G	p.?	COSN2535371	1	Unknown
	c.*949A>G	p.?	COSN2535372	1	Unknown
	c.*950T>C	p.?	COSN2535373	1	Unknown
	c.*953A>G	p.?	COSN2535374	1	Unknown
	c.*963T>C	p.?	COSN2535375	2	Unknown
	c.*964T>C	p.?	COSN2535377	2	Unknown
	c.*965G>T	p.?	COSN2535379	1	Unknown
	c.*966T>C	p.?	COSN2535380	1	Unknown
	c.*972A>T	p.?	COSN2535381	1	Unknown
	c.*974G>A	p.?	COSN2535382	1	Unknown
	c.*983C>T	p.?	COSN2535383	1	Unknown
	c.*984A>G	p.?	COSN2535384	1	Unknown
	c.*988G>A	p.?	COSN2535385	1	Unknown
	c.*991C>G	p.?	COSN2535386	1	Unknown
	c.*992C>A	p.?	COSN2535387	4	Unknown
	c.*992C>G	p.?	COSN2535391	1	Unknown
	c.*994T>G	p.?	COSN2535392	1	Unknown
	c.*996T>C	p.?	COSN2535393	1	Unknown
	c.*996T>G	p.?	COSN2535394	1	Unknown
	c.?	p.?	COSM14281	34	Unknown
	c.?_?del?	p.?	COSM17865	1	Unknown
	c.?_?del?	p.?Xfs*?	COSM5006568	5	Deletion - Frameshift
	c.?_?ins?	p.?Xfs*?	COSM5006567	10	Deletion - Frameshift
KDR
75	c.223G>T	p.E75*	COSM6957212	1	Substitution - Nonsense
89	c.267A>T	p.T89=	COSM481347	1	Substitution - coding silent
143	c.428del	p.N143Tfs*5	COSM6962435	1	Deletion - Frameshift
157	c.469C>T	p.L157F	COSM1662408	1	Substitution - Missense
248	c.743C>G	p.A248G	COSM21091	2	Substitution - Missense
289	c.866del	p.L289*	COSM3358577	1	Deletion - Frameshift
396	c.1188C>A	p.Y396*	COSM6946885	1	Substitution - Nonsense
397	c.1190C>G	p.T397S	COSM6922745	1	Substitution - Missense
406	c.1218G>A	p.K406=	COSM10046368	3	Substitution - coding silent
456	c.1367T>G	p.I456S	COSM481346	1	Substitution - Missense
515	c.1543A>G	p.S515G	COSM6966298	1	Substitution - Missense
532	c.1595C>T	p.A532V	COSM3301570	1	Substitution - Missense
567	c.1699G>A	p.V567M	COSM249552	1	Substitution - Missense
575	c.1725A>T	p.R575S	COSM4187403	1	Substitution - Missense
580	c.1739A>T	p.N580I	COSM7418177	1	Substitution - Missense
677	c.2030C>T	p.T677M	COSM192180	1	Substitution - Missense
692	c.2075G>T	p.G692V	COSM481345	1	Substitution - Missense
719	c.2156A>G	p.N719S	COSM249484	1	Substitution - Missense
761	c.2282C>G	p.T761R	COSM8660338	1	Substitution - Missense
761	c.2282C>T	p.T761M	COSM7346615	1	Substitution - Missense
764	c.2290G>A	p.E764K	COSM6935788	1	Substitution - Missense
879	c.2635C>T	p.H879Y	COSM6953943	1	Substitution - Missense
1051	c.3152G>A	p.R1051Q	COSM481344	1	Substitution - Missense
1078	c.3234del	p.F1078Lfs*24	COSM6933571	1	Deletion - Frameshift
1108	c.3322G>T	p.G1108W	COSM481343	1	Substitution - Missense
1145	c.3433G>A	p.G1145R	COSM1430203	1	Substitution - Missense
1219	c.3656G>A	p.G1219E	COSM4410978	3	Substitution - Missense
